# Supplementary material for: Controlling Amyloid Beta Peptide Aggregation and Toxicity by Protease-Stable Ligands
Source: PubMed Central journal article supplement — ACS Bio Med Chem Au. 2023 Feb 15;3(2):158–73. doi: 10.1021/acsbiomedchemau.2c00067 (PMC10125337; doi:10.1021/acsbiomedchemau.2c00067), 2023-02-15
Supplement: bg2c00067_si_001.pdf [file bg2c00067_si_001.pdf]

## **Electronic Supplementary Information**

### **Controlling Amyloid Beta (A $\beta$ ) Peptide Aggregation and Toxicity by Protease Stable**

#### **Ligands**

Rathnam Mallesh,<sup>1,2,3</sup> Juhee Khan,<sup>1,2</sup> Prabir Kumar Gharai,<sup>1,2</sup> Varsha Gupta,<sup>1,2</sup> Rajsekhar Roy,<sup>1</sup>  
and Surajit Ghosh<sup>1,2,3\*</sup>

1. Department of Bioscience & Bioengineering, Indian Institute of Technology, Jodhpur, NH 65, Surpura Bypass Road, Karwar, Rajasthan 342037, India, Phone: +91-291-280-1212
2. Organic and Medicinal Chemistry and Structural Biology and Bioinformatics Division, CSIR-Indian Institute of Chemical Biology, 4, Raja S. C. Mullick Road, Jadavpur, Kolkata-700 032, WB, India. Fax: +91-33-2473-5197/0284; Tel: +91-33-2499-5872
3. National Institute of Pharmaceutical Education and Research, Kolkata, Chunilal Bhawan 168, Maniktala Main Road, Kolkata – 700054, India

#### **Corresponding Author**

Dr. Surajit Ghosh

Department of Bioscience & Bioengineering,

Indian Institute of Technology Jodhpur, Karwar 342037, Rajasthan, India;

[orcid.org/0000-0002-8203-8613](https://orcid.org/0000-0002-8203-8613);

Phone: +91-291-280-1212 (Office);

E-mail: [sghosh@iitj.ac.in](mailto:sghosh@iitj.ac.in)

## Table of Contents

### 1. Figure

- 1.1. **Figure S1.** Cellular viability of NT peptides by MTT assay.
- 1.2. **Figure S2.** Cellular viability in PC-12 derived neurons after treatment with A $\beta$ 42 peptide alone and A $\beta$ 42 peptide with NT peptides.
- 1.3. **Figure S3.** Cellular viability in PC-12-derived neurons after treatment with A $\beta$ 42 aggregates alone and A $\beta$ 42 aggregates with NT peptides.
- 1.4. **Figure S4.** Effects of NT peptides on A $\beta$ 42 aggregation measured by ThT assay.
- 1.5. **Figure S5.** BBB crossing of NT peptides, analysis by mass spectrometry.
- 1.6. **Figure S6.** Microscopic images of PC12 derived neurons.

### 2. Appendixes: HPLC and MALDI mass

- 2.1. **Figure S7.** HPLC chromatograph of NT-01.
- 2.2. **Figure S8.** HPLC chromatograph of NT-02.
- 2.3. **Figure S9.** HPLC chromatograph of NT-03.
- 2.4. **Figure S10.** HPLC chromatograph of NT-04.
- 2.5. **Figure S11.** HPLC chromatograph of NT-05.
- 2.6. **Figure S12.** HPLC chromatograph of NT-06.
- 2.7. **Figure S13.** HPLC chromatograph of NT-07.
- 2.8. **Figure S14.** HPLC chromatograph of NT-08.
- 2.9. **Figure S15.** HPLC chromatograph of NT-09.
- 2.10. **Figure S16.** HPLC chromatograph of NT-10.
- 2.11. **Figure S17.** HPLC chromatograph of NT-11.
- 2.12. **Figure S18.** HPLC chromatograph of NT-12.
- 2.13. **Figure S19.** HPLC chromatograph of NT-13.
- 2.14. **Figure S20.** HPLC chromatograph of NT-14.
- 2.15. **Figure S21.** HPLC chromatograph of KLVFF.
- 2.16. **Figure S22.** MALDI mass spectrum of NT-01.
- 2.17. **Figure S23.** MALDI mass spectrum of NT-02.
- 2.18. **Figure S24.** MALDI mass spectrum of NT-03.
- 2.19. **Figure S25.** MALDI mass spectrum of NT-04.
- 2.20. **Figure S26.** MALDI mass spectrum of NT-05.
- 2.21. **Figure S27.** MALDI mass spectrum of NT-06.

- 2.22. Figure S28.** MALDI mass spectrum of NT-07.
- 2.23. Figure S29.** MALDI mass spectrum of NT-08.
- 2.24. Figure S30.** MALDI mass spectrum of NT-09.
- 2.25. Figure S31.** MALDI mass spectrum of NT-10.
- 2.26. Figure S32.** MALDI mass spectrum of NT-11.
- 2.27. Figure S33.** MALDI mass spectrum of NT-12.
- 2.28. Figure S34.** MALDI mass spectrum of NT-13.
- 2.29. Figure S35.** MALDI mass spectrum of NT-14.
- 2.30. Figure S36.** MALDI mass spectrum of KLVFF.
- 2.31. Figure S37.** MALDI mass spectrum of FITC attached NT-02.
- 2.32. Figure S38.** MALDI mass spectrum of FITC attached NT-03.
- 2.33. Figure S39.** MALDI mass spectrum of FITC attached NT-13.
- 2.34. Figure S40.** HRMS mass spectrum of NT-02.
- 2.35. Figure S41.** HRMS mass spectrum of NT-03.
- 2.36. Figure S42.** HRMS mass spectrum of NT-13.
- 2.37. Figure S43.** HRMS mass spectrum of KLVFF.

**Table S1.** Characterization and HPLC data of synthesized peptides.

| No. | Peptide sequence                                                                    | Molecular formula                                             | MASS       |                | HPLC        |            |
|-----|-------------------------------------------------------------------------------------|---------------------------------------------------------------|------------|----------------|-------------|------------|
|     |                                                                                     |                                                               | Calculated | Obtained (M+H) | $t_R$ (min) | Purity (%) |
| 1   | 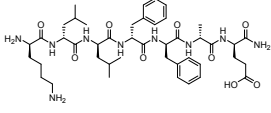   | C <sub>44</sub> H <sub>67</sub> N <sub>9</sub> O <sub>9</sub> | 865.5062   | 865.6390       | 5.196       | 100        |
| 2   |    | C <sub>39</sub> H <sub>60</sub> N <sub>8</sub> O <sub>6</sub> | 736.4636   | 737.7675       | 5.275       | 100        |
| 3   |    | C <sub>36</sub> H <sub>55</sub> N <sub>7</sub> O <sub>5</sub> | 665.4265   | 666.7092       | 5.298       | 100        |
| 4   |   | C <sub>27</sub> H <sub>46</sub> N <sub>6</sub> O <sub>4</sub> | 518.3581   | 519.3088       | 5.303       | 100        |
| 5   |  | C <sub>38</sub> H <sub>55</sub> N <sub>7</sub> O <sub>8</sub> | 737.4112   | 738.5652       | 5.301       | 100        |
| 6   |  | C <sub>33</sub> H <sub>48</sub> N <sub>6</sub> O <sub>5</sub> | 608.3686   | 609.4024       | 5.280       | 100        |
| 7   |  | C <sub>30</sub> H <sub>43</sub> N <sub>5</sub> O <sub>4</sub> | 537.3315   | 538.5833       | 5.232       | 100        |
| 8   |  | C <sub>32</sub> H <sub>44</sub> N <sub>6</sub> O <sub>7</sub> | 624.3271   | 625.3097       | 5.247       | 99.12      |
| 9   |  | C <sub>27</sub> H <sub>37</sub> N <sub>5</sub> O <sub>4</sub> | 495.2846   | 496.2403       | 5.156       | 100        |

|    |                                                                                     |                                                                                                      |          |          |       |       |
|----|-------------------------------------------------------------------------------------|------------------------------------------------------------------------------------------------------|----------|----------|-------|-------|
| 10 | 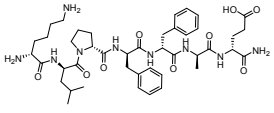   | C <sub>43</sub> H <sub>63</sub> N <sub>9</sub> O <sub>9</sub>                                        | 849.4749 | 850.7135 | 5.201 | 100   |
| 11 |    | C <sub>38</sub> H <sub>56</sub> N <sub>8</sub> O <sub>6</sub>                                        | 720.4323 | 720.6613 | 5.190 | 98.93 |
| 12 |    | C <sub>35</sub> H <sub>51</sub> N <sub>7</sub> O <sub>5</sub>                                        | 649.3952 | 650.2834 | 5.251 | 100   |
| 13 |    | C <sub>37</sub> H <sub>51</sub> N <sub>7</sub> O <sub>8</sub>                                        | 721.3799 | 721.1677 | 5.203 | 100   |
| 14 |    | C <sub>32</sub> H <sub>44</sub> N <sub>6</sub> O <sub>5</sub>                                        | 592.3373 | 593.5271 | 5.178 | 99.58 |
| 15 |  | C <sub>35</sub> H <sub>53</sub> N <sub>7</sub> O <sub>5</sub>                                        | 651.4108 | 652.3820 | 5.222 | 98.98 |
| 16 | <i>Aβ</i> <sub>42</sub>                                                             | NH <sub>2</sub> -<br><sup>1</sup> DAEFRHDSGYEVHHQKLVFFAEDVGSNKGAIIGLMVGG<br>VVIA <sup>42</sup> -COOH |          |          |       |       |

**Table S 2.** Cell viability of NT peptides in PC-12 derived neurons.

| S. No. | Peptide sequence                         | % Cell viability                        |        |        |       |       |       |
|--------|------------------------------------------|-----------------------------------------|--------|--------|-------|-------|-------|
|        |                                          | Peptides concentration range ( $\mu$ M) |        |        |       |       |       |
|        |                                          | 5                                       | 10     | 20     | 40    | 80    | 160   |
| 1      | H <sub>2</sub> N-KLLFFAE-NH <sub>2</sub> | 100.05                                  | 100.01 | 100.02 | 99.56 | 98.99 | 98.04 |
| 2      | H <sub>2</sub> N-KLLFFA-NH <sub>2</sub>  | 99.79                                   | 98.72  | 97.25  | 95.57 | 92.14 | 91.01 |
| 3      | H <sub>2</sub> N-KLLFF-NH <sub>2</sub>   | 100.03                                  | 99.85  | 99.05  | 99.56 | 98.99 | 98.95 |
| 4      | H <sub>2</sub> N-KLLF-NH <sub>2</sub>    | 100                                     | 99.95  | 98.71  | 98.57 | 96.52 | 92.19 |
| 5      | H <sub>2</sub> N-LLFFAE-NH <sub>2</sub>  | 100.02                                  | 99.91  | 98.26  | 97.23 | 95.62 | 91.28 |
| 6      | H <sub>2</sub> N-LLFFA-NH <sub>2</sub>   | 98.85                                   | 92.54  | 86.00  | 80.87 | 75.78 | 71.68 |
| 7      | H <sub>2</sub> N-LLFF-NH <sub>2</sub>    | 65.35                                   | 60.98  | 57.38  | 52.98 | 46.87 | 42.54 |
| 8      | H <sub>2</sub> N-LFFAE-NH <sub>2</sub>   | 88.98                                   | 81.56  | 75.61  | 65.26 | 56.83 | 50.07 |
| 9      | H <sub>2</sub> N-LFFA-NH <sub>2</sub>    | 100.05                                  | 98.01  | 96.53  | 90.24 | 85.62 | 78.29 |
| 10     | H <sub>2</sub> N-KLPFFAE-NH <sub>2</sub> | 100                                     | 98.12  | 95.98  | 91.47 | 85.12 | 79.31 |
| 11     | H <sub>2</sub> N-KLPFFA-NH <sub>2</sub>  | 100                                     | 99.10  | 97.05  | 95.84 | 91.80 | 89.24 |
| 12     | H <sub>2</sub> N-KLPFF-NH <sub>2</sub>   | 100                                     | 100.05 | 100    | 100   | 99.98 | 99.96 |
| 13     | H <sub>2</sub> N-LPFFAE-NH <sub>2</sub>  | 100                                     | 99.52  | 99.01  | 97.34 | 95.71 | 91.67 |
| 14     | H <sub>2</sub> N-LPFFA-NH <sub>2</sub>   | 100                                     | 100    | 100    | 100   | 99.91 | 99.50 |
| 15     | H <sub>2</sub> N-KLVFF-NH <sub>2</sub>   | 100                                     | 100    | 100    | 100   | 100   | 100   |
| 16     | Control                                  | 100                                     |        |        |       |       |       |

\*Each experiment was done in triplicates (n= 3). ODs (absorbance) of samples with untreated cells were set to 100. Taking the cell viability of untreated cells as 100, percentage cell viabilities were calculated for the samples treated with A $\beta$ 42 alone or plus the NT peptides. Subsequently, the percentage inhibition of A $\beta$  toxicity by each test peptide was calculated by using the formula: Cell viability (%) = {[A570 (treated cells) - A570 (blank)] / [A570 (control cells) - A570 (blank)]} \*100. Blank ODs were subtracted from each sample OD and the triplicate ODs were averaged. In a subset of triplicate wells, OD readings did not deviate much from the mean and SD ranged between 1.12-6.4.

**Table S 3.** Cell viability and neuroprotection effect of NT peptides against  $A\beta_{42}$  induced toxicity in PC-12 derived neurons.

| S. No. | Peptide sequence                         | % Cell viability after treated with peptide and $A\beta_{42}$ (5 $\mu$ M)<br>peptide |       |       |       |       |       |
|--------|------------------------------------------|--------------------------------------------------------------------------------------|-------|-------|-------|-------|-------|
|        |                                          | Peptides concentration range ( $\mu$ M)                                              |       |       |       |       |       |
|        |                                          | 5                                                                                    | 10    | 20    | 40    | 80    | 160   |
| 1      | H <sub>2</sub> N-KLLFFAE-NH <sub>2</sub> | 43.20                                                                                | 48.98 | 51.01 | 55.41 | 58.35 | 60.15 |
| 2      | H <sub>2</sub> N-KLLFFA-NH <sub>2</sub>  | 75.13                                                                                | 79.69 | 80.72 | 85.87 | 86.08 | 90.18 |
| 3      | H <sub>2</sub> N-KLLFF-NH <sub>2</sub>   | 76.64                                                                                | 76.73 | 75.30 | 82.14 | 85.81 | 88.24 |
| 4      | H <sub>2</sub> N-KLLF-NH <sub>2</sub>    | 73.46                                                                                | 68.15 | 60.01 | 56.78 | 51.26 | 48.20 |
| 5      | H <sub>2</sub> N-LLFFAE-NH <sub>2</sub>  | 74.38                                                                                | 69.91 | 66.34 | 61.12 | 58.84 | 56.42 |
| 6      | H <sub>2</sub> N-LLFFA-NH <sub>2</sub>   | 62.61                                                                                | 58.25 | 54.21 | 48.07 | 42.19 | 38.24 |
| 7      | H <sub>2</sub> N-LLFF-NH <sub>2</sub>    | 35.54                                                                                | 32.19 | 29.51 | 23.78 | 19.98 | 19.26 |
| 8      | H <sub>2</sub> N-LFFAE-NH <sub>2</sub>   | 44.35                                                                                | 43.15 | 38.02 | 25.91 | 20.75 | 15.67 |
| 9      | H <sub>2</sub> N-LFFA-NH <sub>2</sub>    | 40.33                                                                                | 41.05 | 45.08 | 47.50 | 49.35 | 48.32 |
| 10     | H <sub>2</sub> N-KLPFFAE-NH <sub>2</sub> | 50.19                                                                                | 55.06 | 56.53 | 58.73 | 60.24 | 62.63 |
| 11     | H <sub>2</sub> N-KLPFFA-NH <sub>2</sub>  | 60.08                                                                                | 58.67 | 55.54 | 50.15 | 50.86 | 49.13 |
| 12     | H <sub>2</sub> N-KLPFF-NH <sub>2</sub>   | 63.10                                                                                | 64.98 | 66.31 | 68.01 | 69.08 | 71.06 |
| 13     | H <sub>2</sub> N-LPFFAE-NH <sub>2</sub>  | 76.08                                                                                | 84.16 | 82.27 | 84.62 | 83.02 | 85.58 |
| 14     | H <sub>2</sub> N-LPFFA-NH <sub>2</sub>   | 60.58                                                                                | 63.24 | 64.15 | 66.20 | 67.68 | 67.52 |
| 15     | H <sub>2</sub> N-KLVFF-NH <sub>2</sub>   | 72.08                                                                                | 73.60 | 77.06 | 80.36 | 83.13 | 83.79 |
| 16     | Control                                  | 100                                                                                  |       |       |       |       |       |
| 17     | $A\beta_{42}$                            | 38.05                                                                                |       |       |       |       |       |

\*Each experiment was done in triplicates (n= 3). ODs (absorbance) of samples with untreated cells were set to 100. Taking the cell viability of untreated cells as 100, percentage cell viabilities were calculated for the samples treated with  $A\beta_{42}$  alone or plus the NT peptides. Subsequently, the percentage inhibition of  $A\beta$  toxicity by each test peptide was calculated by using the formula: Cell viability (%) = {[A570 (treated cells) - A570 (blank)] / [A570 (control cells) - A570 (blank)]} \*100. Blank ODs were subtracted from each sample OD and the triplicate ODs were averaged. In a subset of triplicate wells, OD readings did not deviate much from the mean and SD ranged between 1.09-6.2.

**Table S 4.** Cell viability and neuroprotection effect of NT peptides against  $A\beta_{42}$  induced toxicity in PC-12 derived neurons.

| S. No. | Peptide sequence        | % Cell viability after treated with peptides and $A\beta_{42}$ (5 $\mu$ M) aggregates |       |       |       |       |       |
|--------|-------------------------|---------------------------------------------------------------------------------------|-------|-------|-------|-------|-------|
|        |                         | Peptides concentration range ( $\mu$ M)                                               |       |       |       |       |       |
|        |                         | 5                                                                                     | 10    | 20    | 40    | 80    | 160   |
| 1      | $H_2N$ -KLLFFAE- $NH_2$ | 62.30                                                                                 | 64.19 | 65.60 | 68.49 | 72.57 | 75.27 |
| 2      | $H_2N$ -KLLFFA- $NH_2$  | 84.36                                                                                 | 85.91 | 88.07 | 90.10 | 93.24 | 94.30 |
| 3      | $H_2N$ -KLLFF- $NH_2$   | 82.64                                                                                 | 84.73 | 85.30 | 87.56 | 90.81 | 92.41 |
| 4      | $H_2N$ -KLLF- $NH_2$    | 76.24                                                                                 | 78.08 | 80.20 | 81.58 | 82.36 | 84.23 |
| 5      | $H_2N$ -LLFFAE- $NH_2$  | 68.82                                                                                 | 69.52 | 70.34 | 72.10 | 75.18 | 76.14 |
| 6      | $H_2N$ -LLFFA- $NH_2$   | 52.23                                                                                 | 48.69 | 44.81 | 42.02 | 42.09 | 40.80 |
| 7      | $H_2N$ -LLFF- $NH_2$    | 55.15                                                                                 | 53.21 | 50.83 | 44.61 | 39.12 | 31.75 |
| 8      | $H_2N$ -LFFAE- $NH_2$   | 53.08                                                                                 | 50.06 | 48.69 | 42.09 | 38.38 | 35.16 |
| 9      | $H_2N$ -LFFA- $NH_2$    | 68.62                                                                                 | 65.05 | 63.28 | 62.23 | 59.15 | 56.09 |
| 10     | $H_2N$ -KLPFFAE- $NH_2$ | 65.24                                                                                 | 63.98 | 62.15 | 60.98 | 59.23 | 58.14 |
| 11     | $H_2N$ -KLPFFA- $NH_2$  | 72.35                                                                                 | 65.98 | 60.17 | 57.06 | 56.15 | 55.54 |
| 12     | $H_2N$ -KLPFF- $NH_2$   | 73.10                                                                                 | 75.57 | 76.96 | 77.41 | 81.22 | 83.06 |
| 13     | $H_2N$ -LPFFAE- $NH_2$  | 82.35                                                                                 | 85.52 | 87.16 | 89.32 | 90.14 | 92.16 |
| 14     | $H_2N$ -LPFFA- $NH_2$   | 72.18                                                                                 | 73.02 | 73.77 | 74.02 | 75.56 | 76.05 |
| 15     | $H_2N$ -KLVFF- $NH_2$   | 78.01                                                                                 | 81.02 | 84.16 | 86.12 | 87.35 | 89.23 |
| 16     | Control                 | 100                                                                                   |       |       |       |       |       |
| 17     | $A\beta_{42}$           | 43.27                                                                                 |       |       |       |       |       |

\*Each experiment was done in triplicates (n=3). ODs (absorbance) of samples with untreated cells were set to 100. Taking the cell viability of untreated cells as 100, percentage cell viabilities were calculated for the samples treated with  $A\beta_{42}$  alone or plus the NT peptides. Subsequently, the percentage inhibition of  $A\beta$  toxicity by each test peptide was calculated by using the formula: Cell viability (%) =  $\{[A570$  (treated cells) -  $A570$  (blank)] /  $[A570$  (control cells) -  $A570$  (blank)] $\} \times 100$ . Blank ODs were subtracted from each sample OD and the triplicate ODs were averaged. In a subset of triplicate wells, OD readings did not deviate much from the mean and SD ranged between 1.9-6.7.



**Table S5.** *ThT assay and inhibition of A $\beta$ <sub>42</sub> aggregation.*

| Peptides                      | % Of A $\beta$ <sub>42</sub> aggregations after treated with NT peptides |       |       |       |       |       |
|-------------------------------|--------------------------------------------------------------------------|-------|-------|-------|-------|-------|
|                               | NT Peptides concentration range ( $\mu$ M)                               |       |       |       |       |       |
|                               | 5                                                                        | 10    | 20    | 40    | 80    | 160   |
| NT-01                         | 72.71                                                                    | 68.16 | 65.52 | 63.95 | 60.15 | 61.04 |
| NT-02                         | 42.39                                                                    | 36.33 | 29.77 | 25.57 | 22.14 | 21.04 |
| NT-03                         | 45.74                                                                    | 35.71 | 25.34 | 21.56 | 20.63 | 19.37 |
| NT-04                         | 52.86                                                                    | 50.57 | 49.80 | 48.52 | 45.67 | 40.10 |
| NT-05                         | 55.36                                                                    | 50.14 | 48.64 | 44.52 | 40.65 | 41.29 |
| NT-06                         | 56.64                                                                    | 53.41 | 53.63 | 51.36 | 43.14 | 40.64 |
| NT-07                         | 90.32                                                                    | 86.31 | 75.03 | 65.98 | 64.87 | 62.50 |
| NT-08                         | 56.17                                                                    | 54.47 | 52.57 | 50.10 | 48.44 | 45.70 |
| NT-09                         | 51.75                                                                    | 48.40 | 46.50 | 42.24 | 40.20 | 38.59 |
| NT-10                         | 72.44                                                                    | 66.96 | 54.04 | 47.48 | 45.25 | 43.14 |
| NT-11                         | 58.94                                                                    | 55.67 | 53.37 | 52.80 | 50.25 | 48.46 |
| NT-12                         | 60.38                                                                    | 57.62 | 55.24 | 52.10 | 20.21 | 50.10 |
| NT-13                         | 51.59                                                                    | 35.61 | 24.49 | 23.15 | 22.25 | 20.12 |
| NT-14                         | 75.15                                                                    | 70.80 | 68.02 | 51.78 | 45.82 | 41.05 |
| NT-15                         | 58.13                                                                    | 55.02 | 48.04 | 39.18 | 35.98 | 30.29 |
| A $\beta$ <sub>42</sub> Alone | 100                                                                      |       |       |       |       |       |

\*Each experiment was done in triplicates (n= 3). ThT fluorescence intensity of samples A $\beta$ <sub>42</sub> alone was set to 100. Taking the aggregation A $\beta$ <sub>42</sub> alone as 100, % of aggregation was calculated for the samples A $\beta$ <sub>42</sub> treated with the NT peptides. Subsequently, the % aggregation of each peptide was calculated by using the formula: Aggregation (%) = {[FI482 (treated cells)]/ [FI482 (A $\beta$ <sub>42</sub> alone control)]} \*100. The triplicate fluorescence intensity (FI) was averaged. In a subset of triplicate test samples, FIs readings did not deviate much from the mean and SD ranged between 2.16-5.2.

**Table S6.** *Molecular docking studies of NT peptides with A $\beta$ 42 (PDB ID: 1Z0Q) and the binding modes with affinity.*

| <b>No. of modes</b> | <b>The binding affinity of NT-02 towards A<math>\beta</math>42 (kcal/mol)</b> | <b>The binding affinity of NT-03 towards A<math>\beta</math>42 (kcal/mol)</b> | <b>The binding affinity of NT-13 towards A<math>\beta</math>42 (kcal/mol)</b> |
|---------------------|-------------------------------------------------------------------------------|-------------------------------------------------------------------------------|-------------------------------------------------------------------------------|
| <b>1</b>            | -5.2                                                                          | -5.3                                                                          | -4.5                                                                          |
| <b>2</b>            | -5.1                                                                          | -4.9                                                                          | -4.3                                                                          |
| <b>3</b>            | -5.1                                                                          | -4.7                                                                          | -4.3                                                                          |
| <b>4</b>            | -5.1                                                                          | -4.7                                                                          | -4.3                                                                          |
| <b>5</b>            | -5.1                                                                          | -4.7                                                                          | -4.3                                                                          |
| <b>6</b>            | -5.1                                                                          | -4.6                                                                          | -4.2                                                                          |
| <b>7</b>            | -5.0                                                                          | -4.6                                                                          | -4.1                                                                          |
| <b>8</b>            | -5.0                                                                          | -4.6                                                                          | -4.1                                                                          |
| <b>9</b>            | -5.0                                                                          | -4.5                                                                          | -4.0                                                                          |
| <b>10</b>           | -4.9                                                                          | -4.5                                                                          | -4.0                                                                          |
| <b>11</b>           | -4.8                                                                          | -4.4                                                                          | -4.0                                                                          |
| <b>12</b>           | -4.8                                                                          | -4.4                                                                          | -3.9                                                                          |
| <b>13</b>           | -4.7                                                                          | -4.4                                                                          | -3.9                                                                          |
| <b>14</b>           | -4.7                                                                          | -4.3                                                                          | -3.9                                                                          |
| <b>15</b>           | -4.7                                                                          | -4.3                                                                          | -3.9                                                                          |
| <b>16</b>           | -4.6                                                                          | -4.2                                                                          | -3.9                                                                          |
| <b>17</b>           | -4.6                                                                          | -4.2                                                                          | -3.8                                                                          |
| <b>18</b>           | -4.6                                                                          | -4.2                                                                          | -3.8                                                                          |
| <b>19</b>           | -4.6                                                                          | -4.2                                                                          | -3.8                                                                          |
| <b>20</b>           | -4.6                                                                          | -4.1                                                                          | -3.7                                                                          |

**Table S7.** *Animal studies information. (Sex, source, species, number of animals, strains, route, dose*

| <b>Group</b> | <b>Sample</b>      | <b>Sex</b> | <b>Age (weeks)</b> | <b>Weight (gram)</b> | <b>Dose (5mg/kg) 0.1 mL</b> |
|--------------|--------------------|------------|--------------------|----------------------|-----------------------------|
| 1            | Sucrose            | Female     | 8-10               | 54.38                | 0.27 mg                     |
|              |                    | Female     | 8-10               | 53.71                | 0.26 mg                     |
|              |                    | Female     | 8-10               | 57.08                | 0.28 mg                     |
| 2            | NT-02              | Female     | 8-10               | 58.68                | 0.29 mg                     |
|              |                    | Female     | 8-10               | 51.96                | 0.25 mg                     |
|              |                    | Female     | 8-10               | 59.55                | 0.29 mg                     |
| 3            | NT-03              | Female     | 8-10               | 52.17                | 0.26 mg                     |
|              |                    | Female     | 8-10               | 53.67                | 0.26 mg                     |
|              |                    | Female     | 8-10               | 56.92                | 0.28 mg                     |
| 4            | NT-13              | Female     | 8-10               | 56.66                | 0.26 mg                     |
|              |                    | Female     | 8-10               | 55.16                | 0.27 mg                     |
|              |                    | Female     | 8-10               | 54.63                | 0.27 mg                     |
| Source       | CSIR-IICB, Kolkata |            |                    |                      |                             |
| Species      | Mice               |            |                    |                      |                             |
| Strain       | C57BL/6J           |            |                    |                      |                             |
| Route        | Intra Peritoneal   |            |                    |                      |                             |

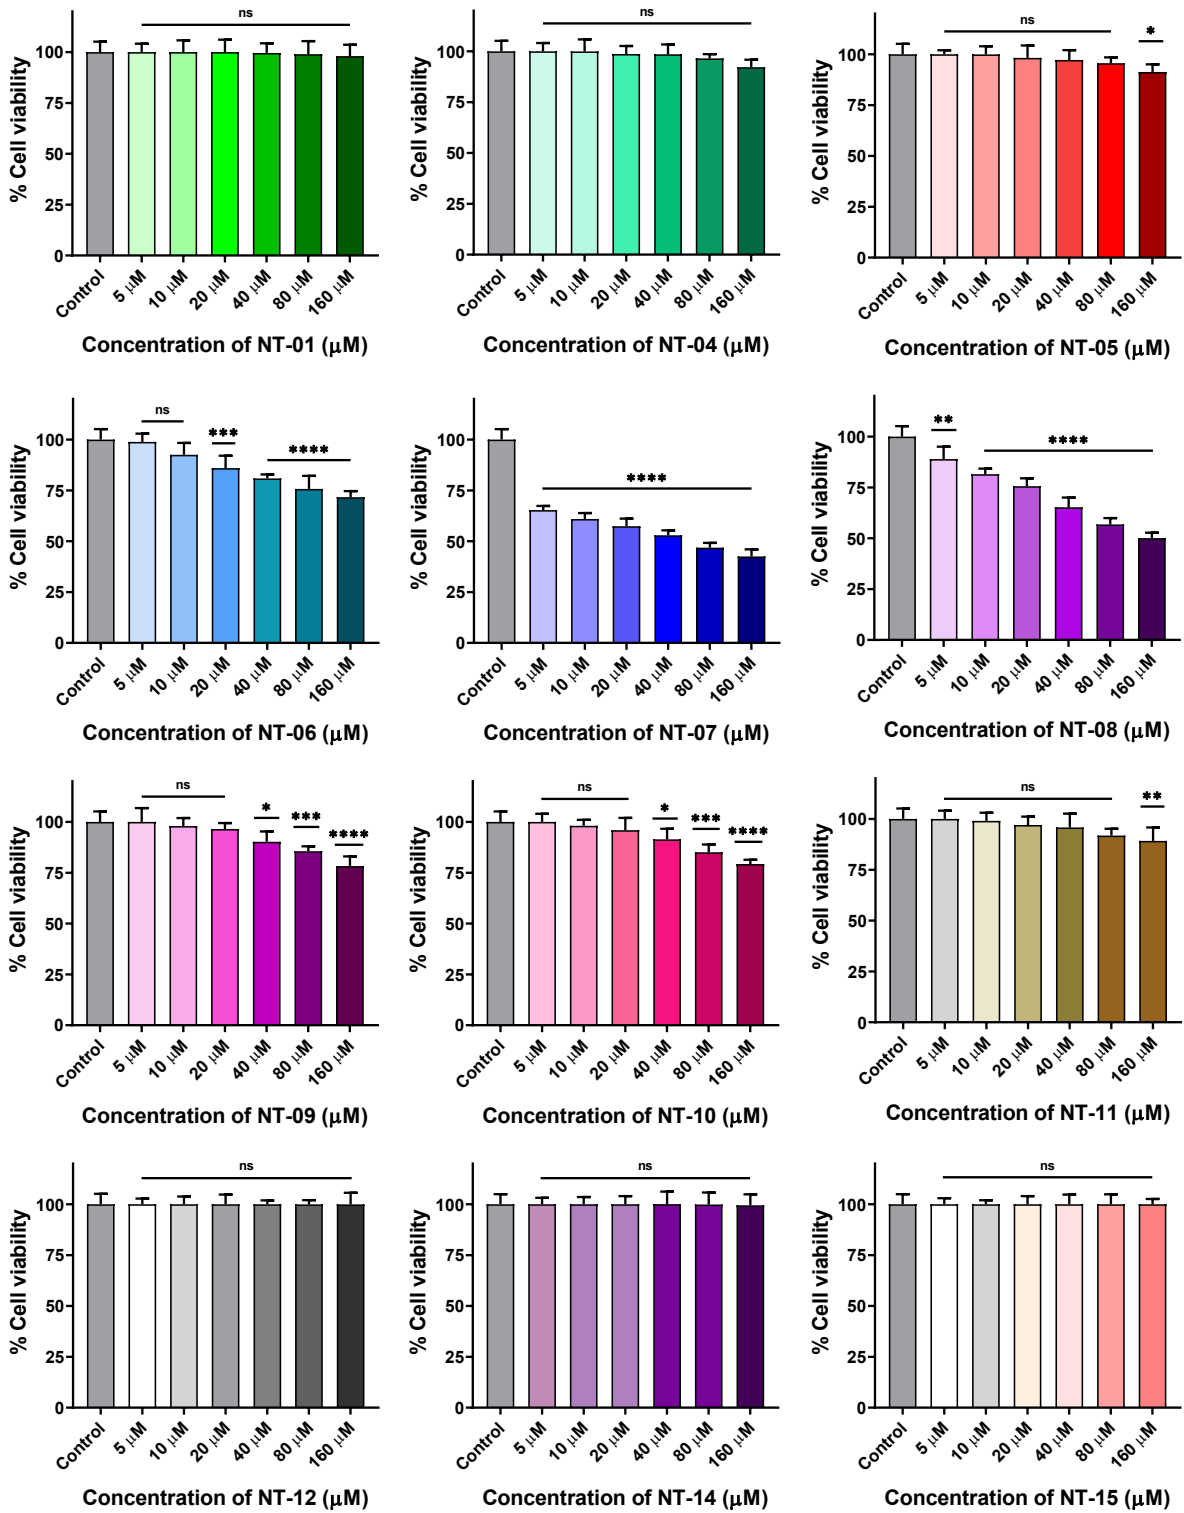

**Figure S1.** Cellular viability of NT peptides with various concentrations 5, 10, 20, 40, 80, and 160  $\mu\text{M}$  in PC-12 derived neurons by using MTT assay.

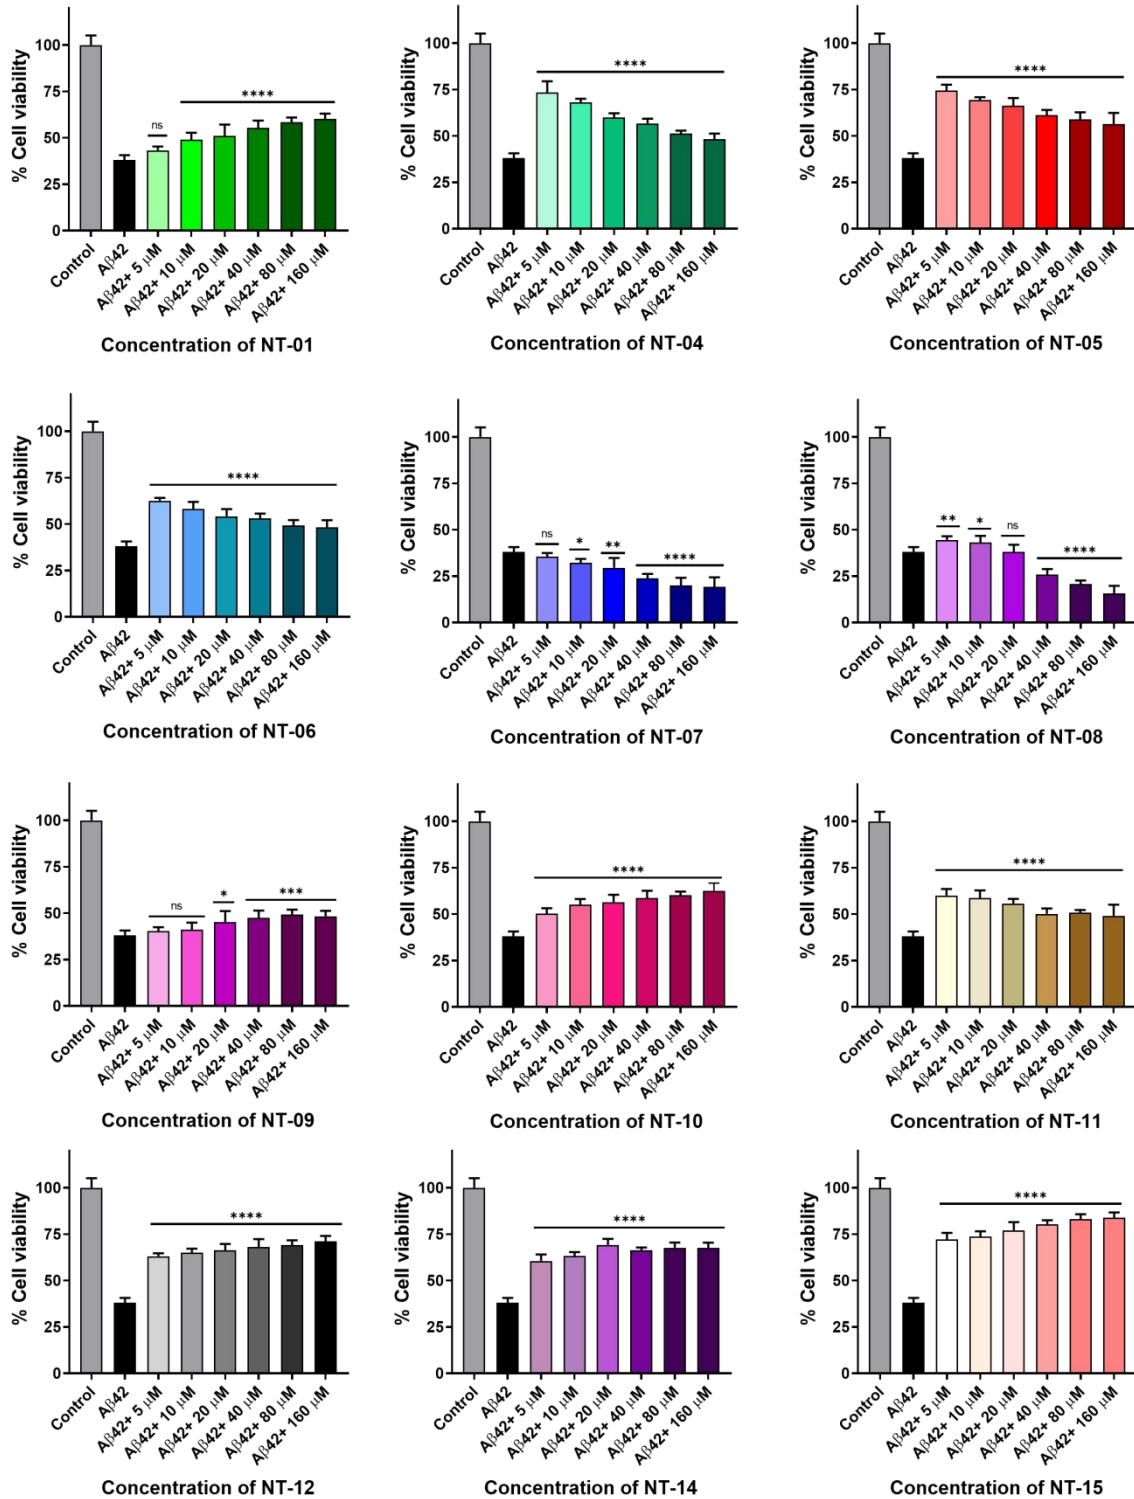

**Figure S2.** Cellular viability. After treatment with Aβ42 peptide alone and Aβ42 peptide with NT peptides with various concentrations 5, 10, 20, 40, 80, and 160 μM and in PC-12 derived neurons by using MTT assay.

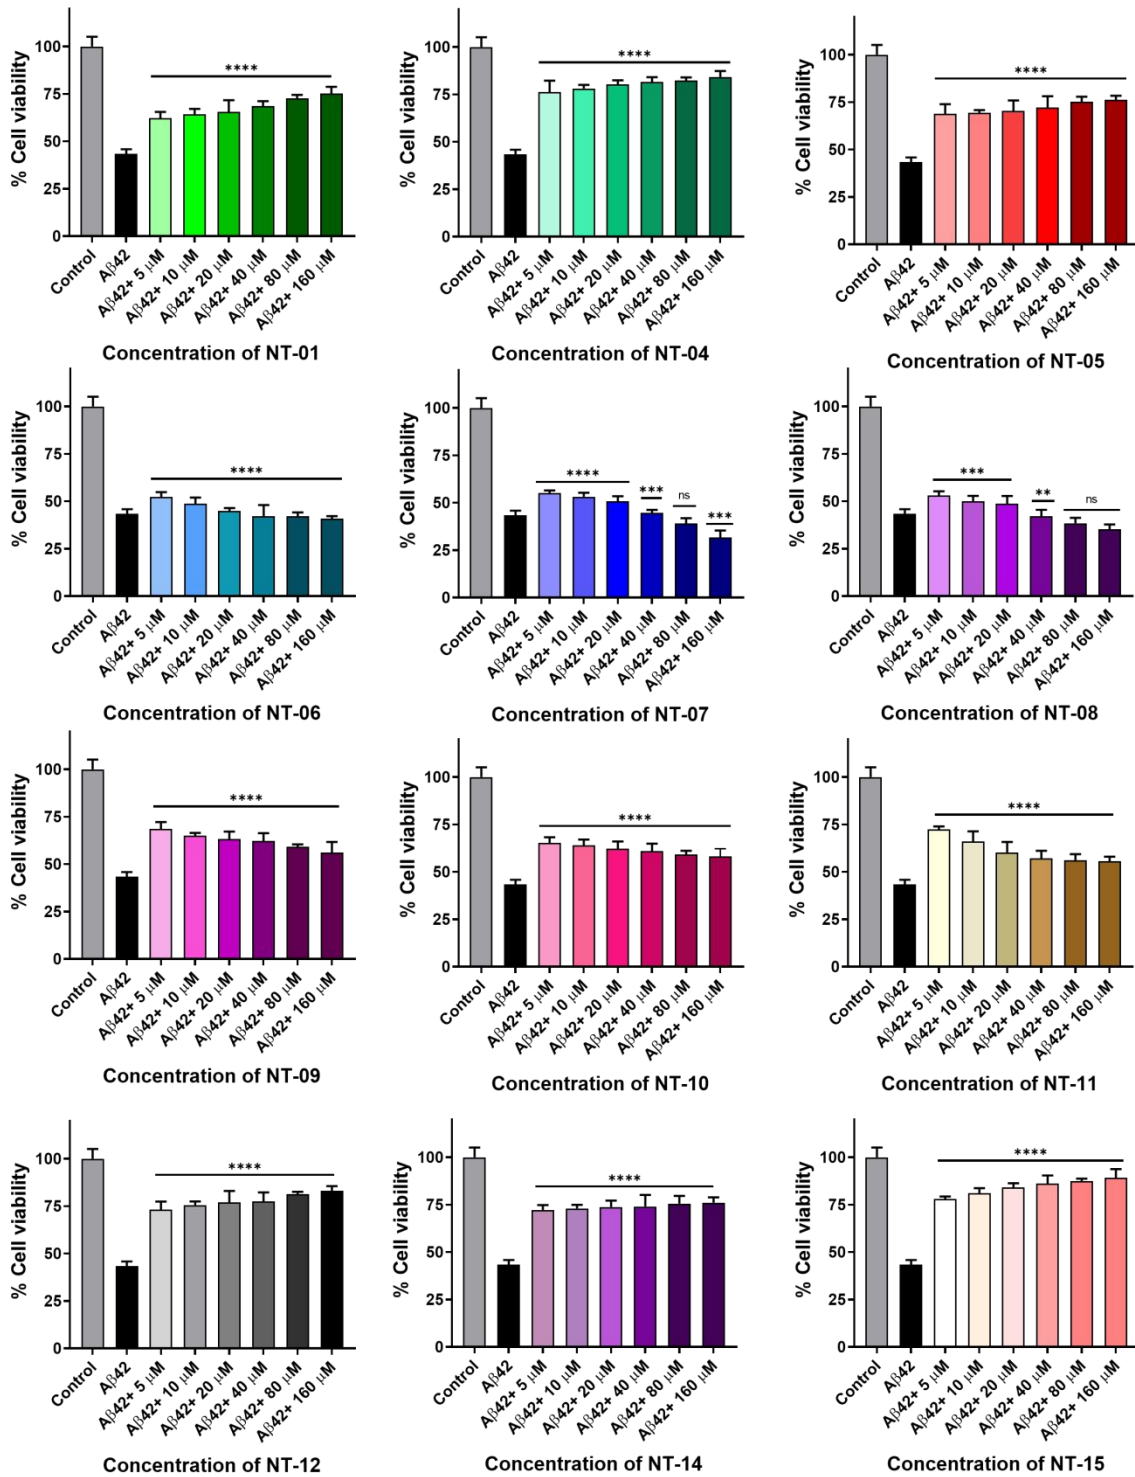

**Figure S3.** Cellular viability. After treatment with Aβ42 aggregates alone and Aβ42 aggregates with NT peptides with various concentrations 5, 10, 20, 40, 80, and 160 μM and in PC-12 derived neurons by using MTT assay.

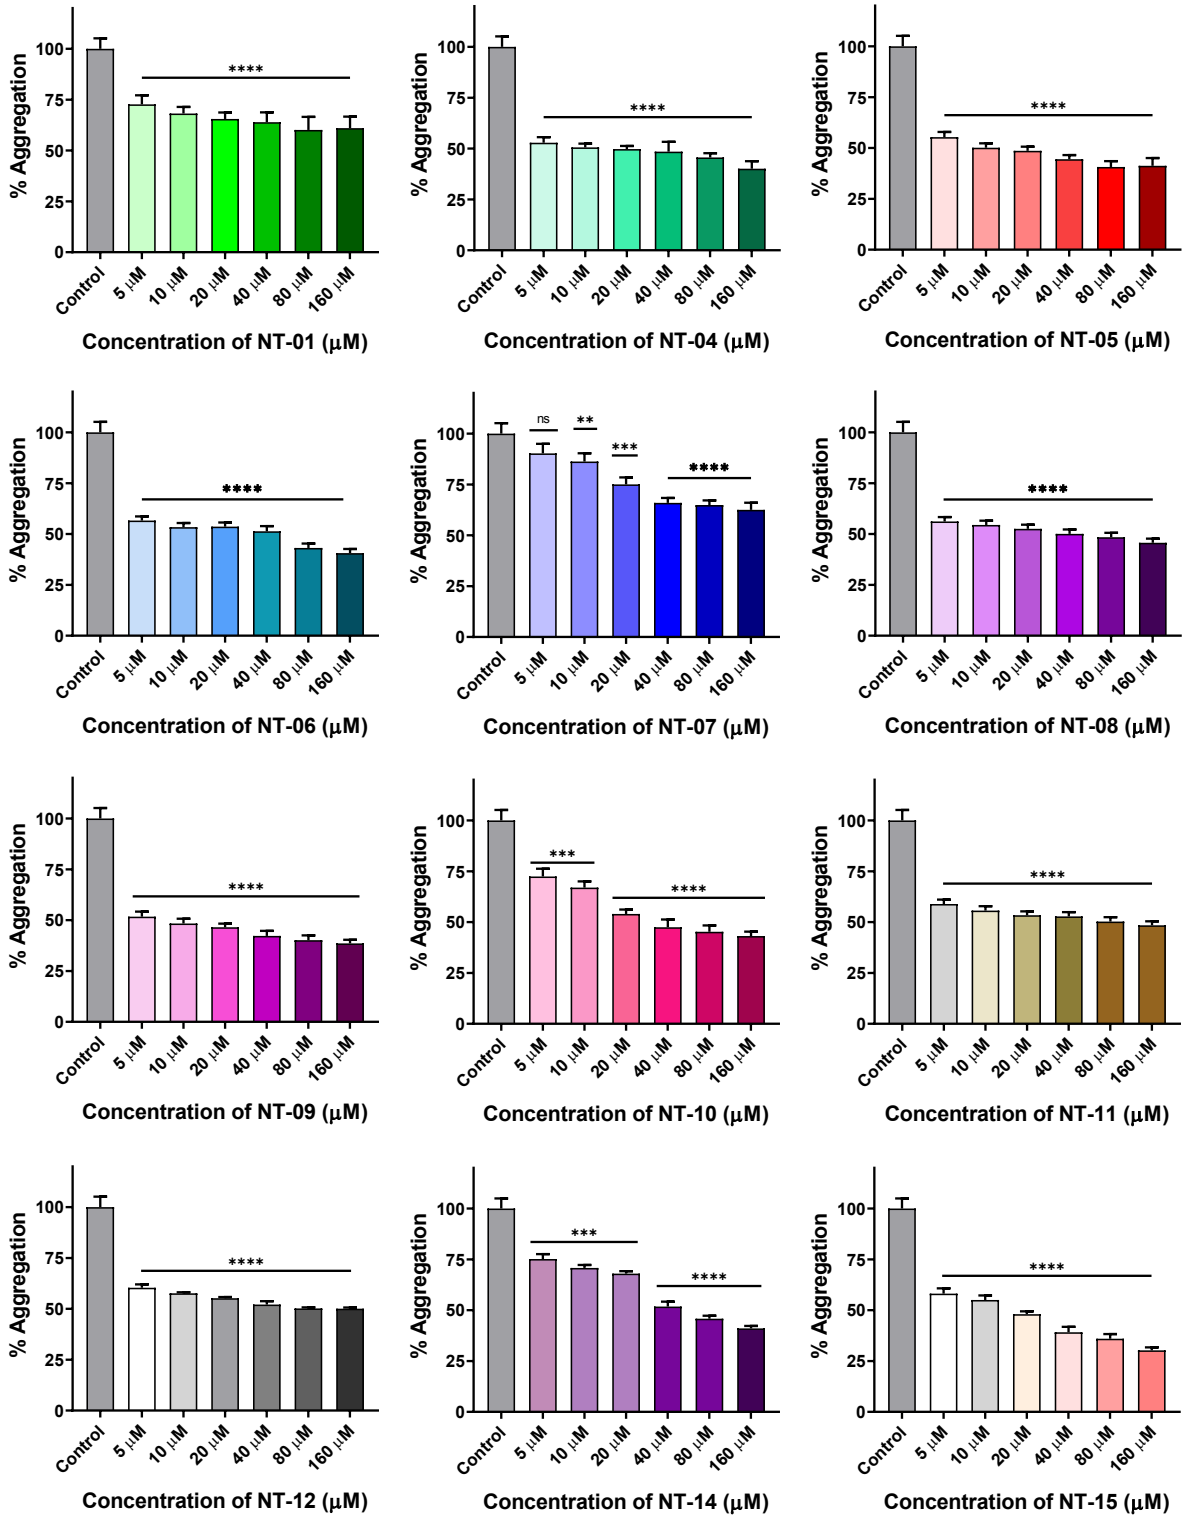

**Figure S4.** Effects of NT peptides on Aβ42 aggregation measured by ThT fluorescence intensity.

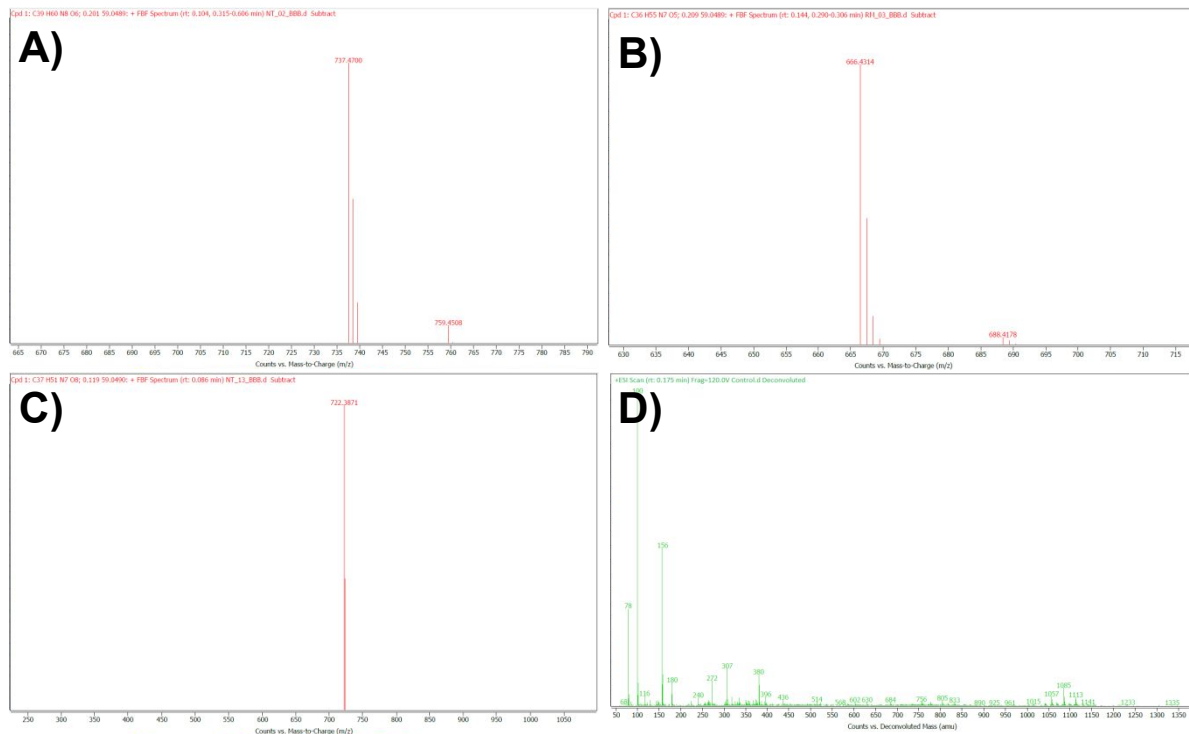

**Figure S5.** BBB crossing by NT peptides and analysed with HRMS mass spectrometry A) NT-02 peptide was identified by the major mass peak at  $M+H = 737.4700$  B) NT-03 peptide was identified by the major mass peak at  $M+H = 666.4314$ . C) NT-13 peptide was identified by the major mass peak at  $M+H = 722.3871$ . D) Control experiment of BBB crossing by sucrose and there is no mass peak at  $342.2965$ .

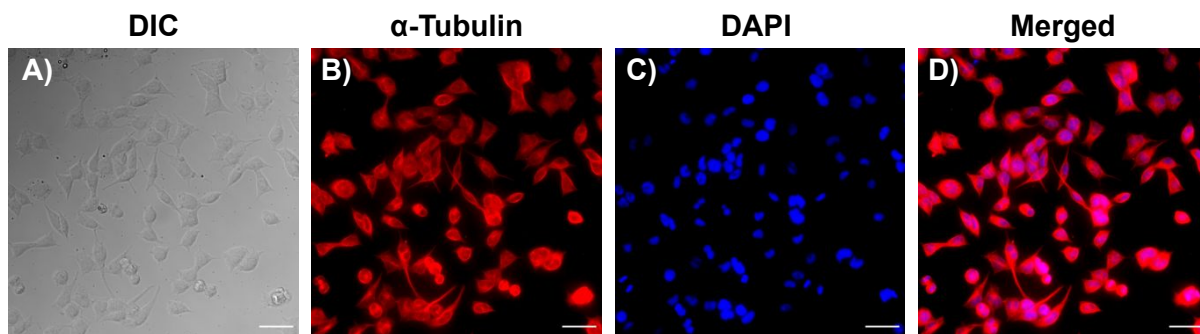

**Figure S6.** Microscopic images of PC12 derived neurons (a) DIC mode (b) TRITC channel (c) DAPI channel and (d) merged channel. Scale bar corresponding to  $50 \mu\text{m}$ .



## 2. Appendixes: HPLC spectra and MALDI mass spectra.

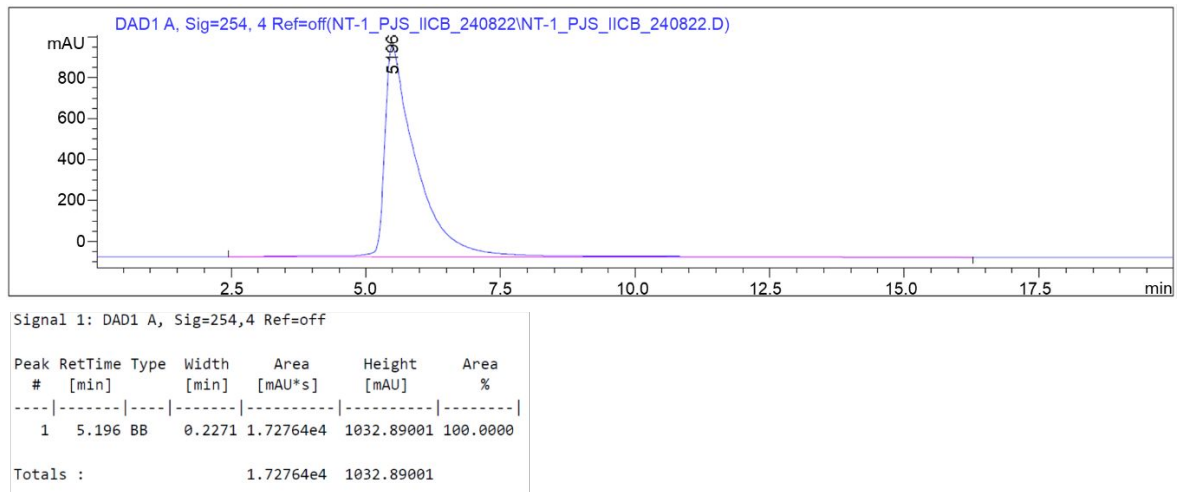

**Figure S7.** HPLC chromatogram of NT-01 peptide.

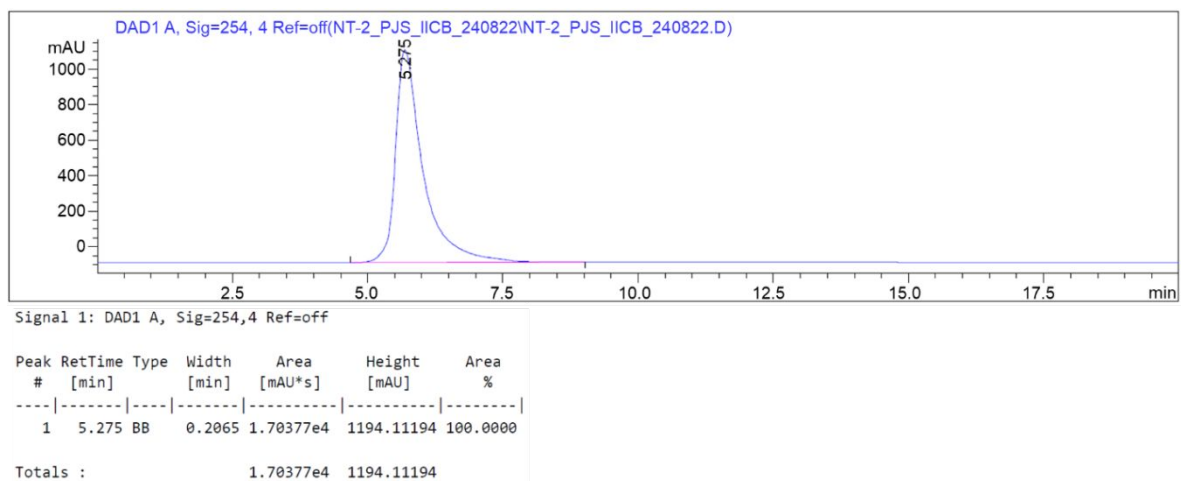

**Figure S8.** HPLC chromatogram of NT-02 peptide.

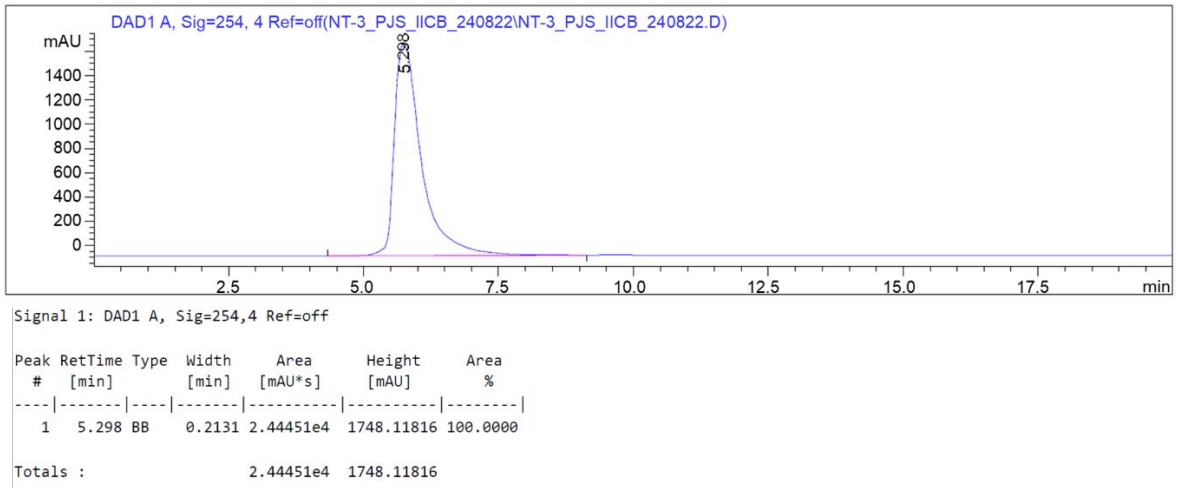

**Figure S9.** HPLC chromatogram of NT-03 peptide.

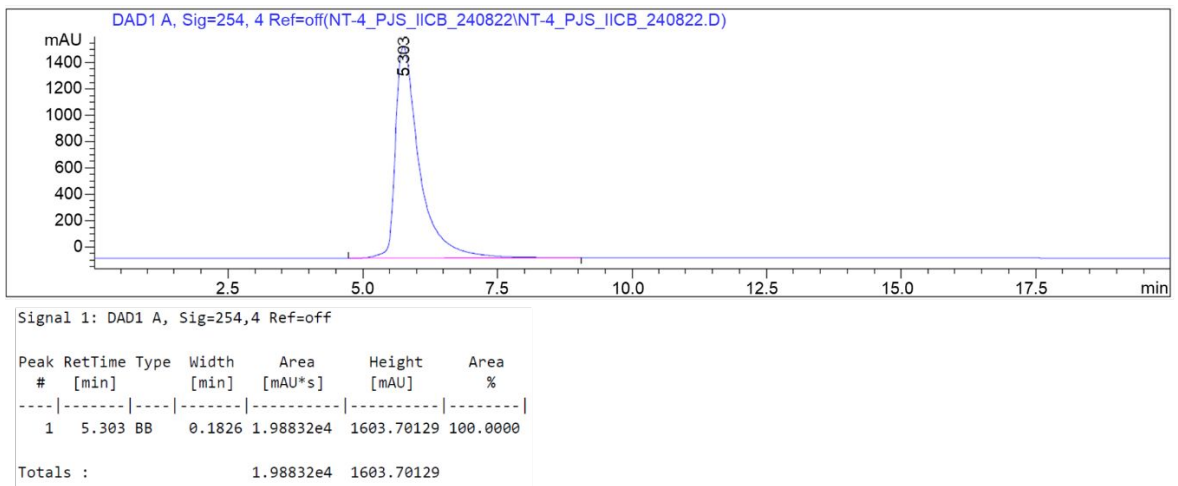

**Figure S10.** HPLC chromatogram of NT-04 peptide.

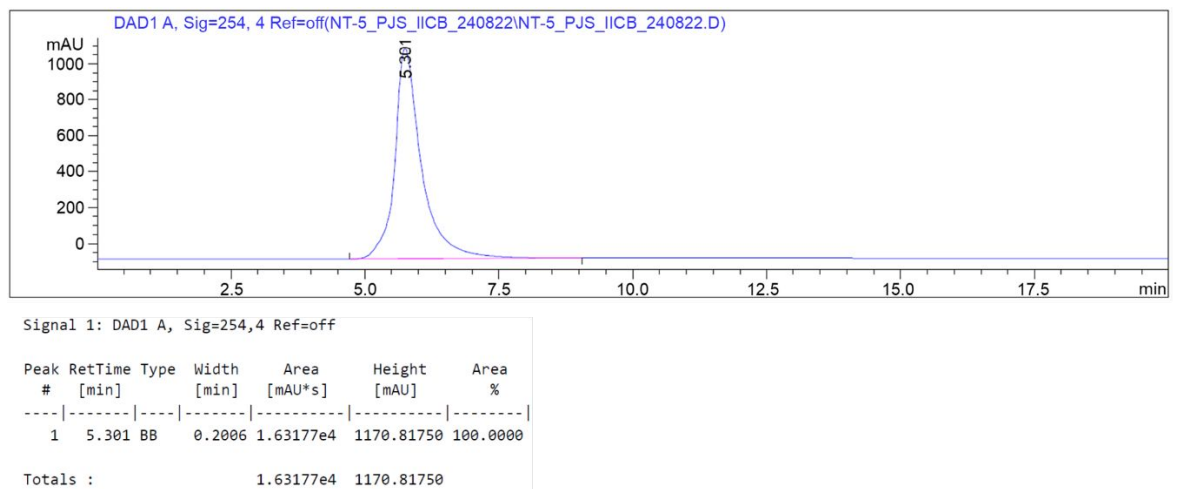

**Figure S11.** HPLC chromatogram of NT-05 peptide.

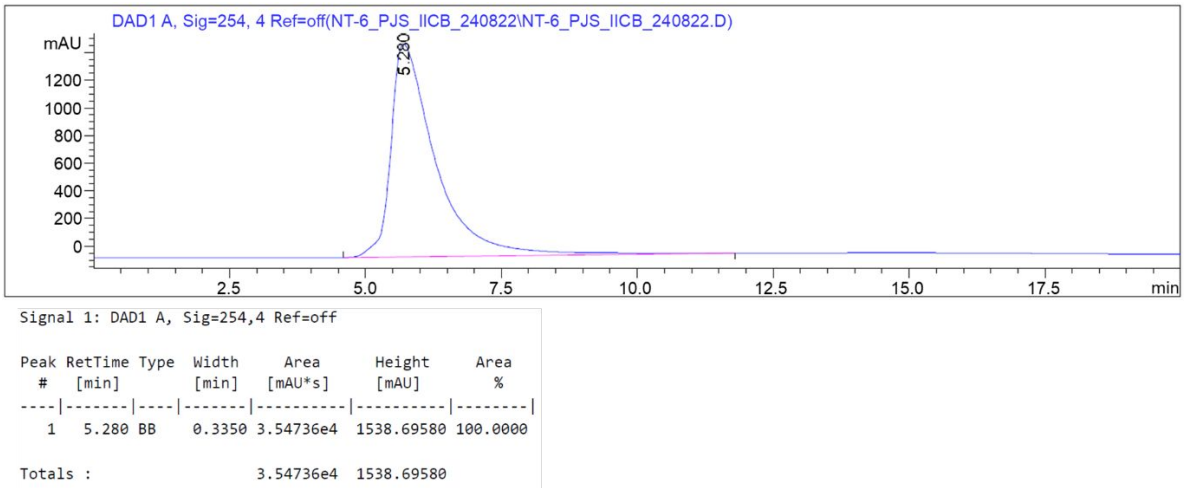

**Figure S12.** HPLC chromatogram of NT-06 peptide.

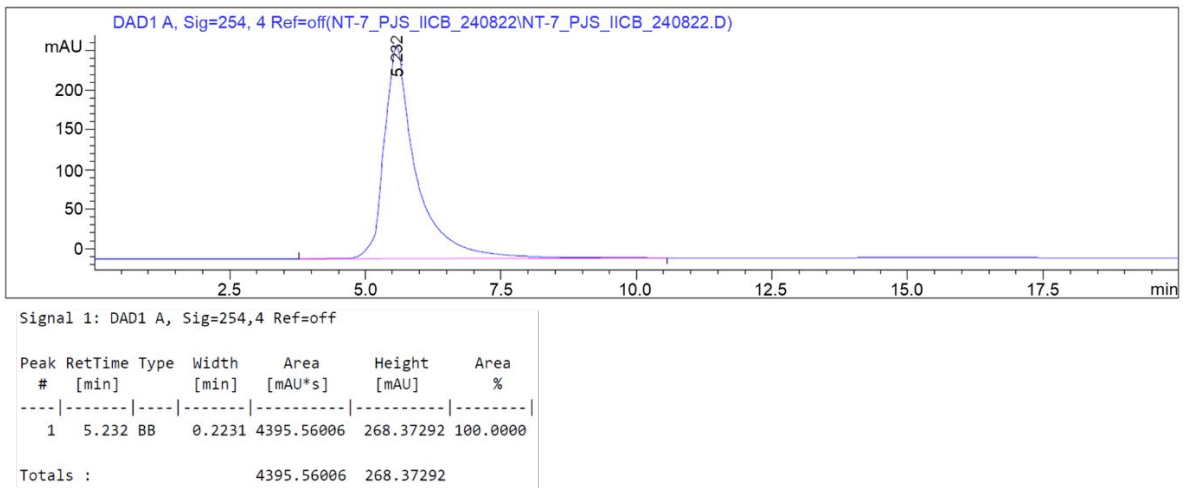

**Figure S13.** HPLC chromatogram of NT-07 peptide.

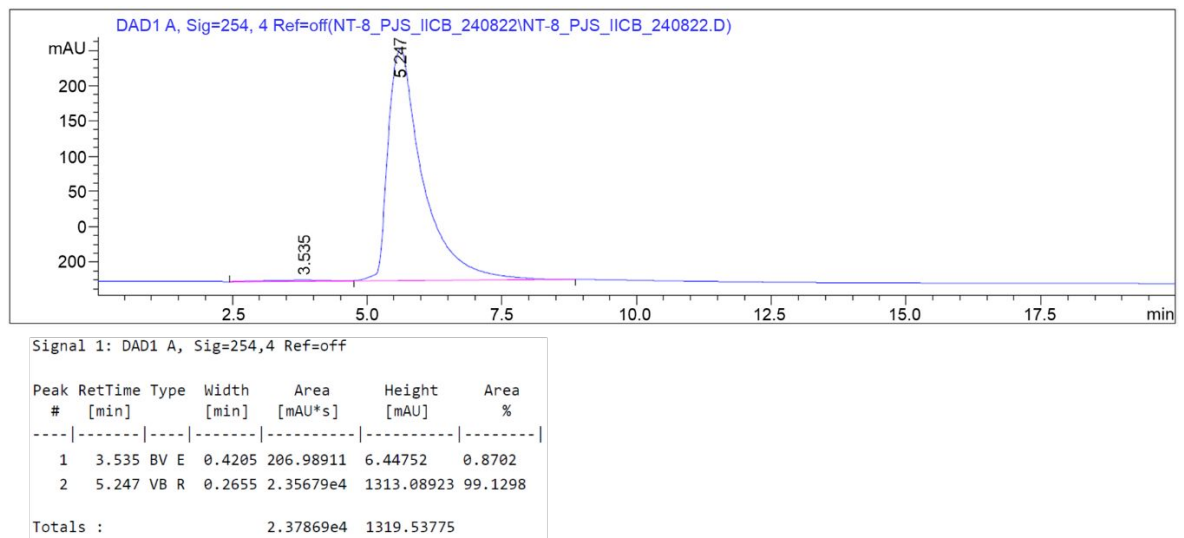

**Figure S14.** HPLC chromatogram of NT-08 peptide.

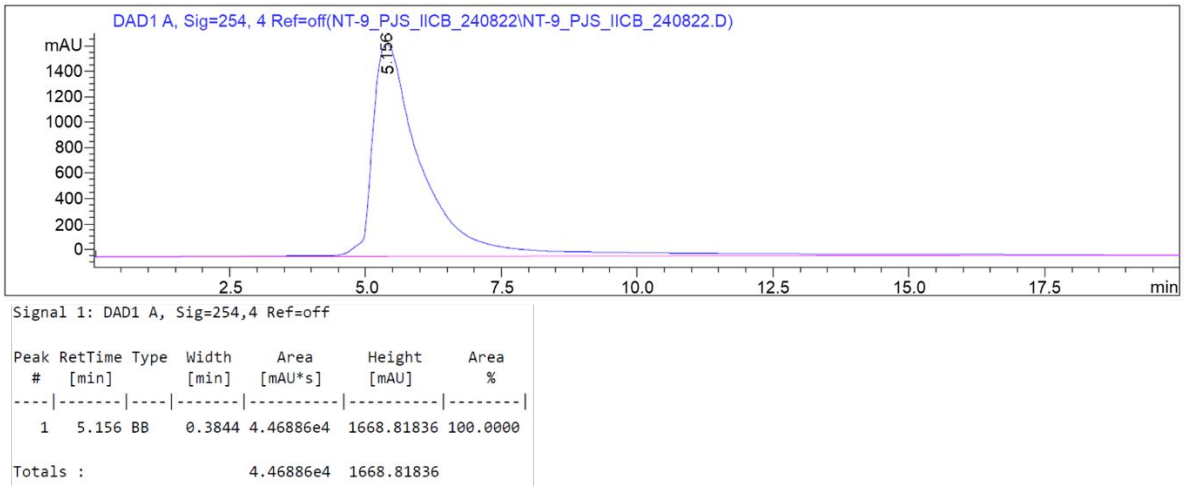

**Figure S15.** HPLC chromatogram of NT-09 peptide.

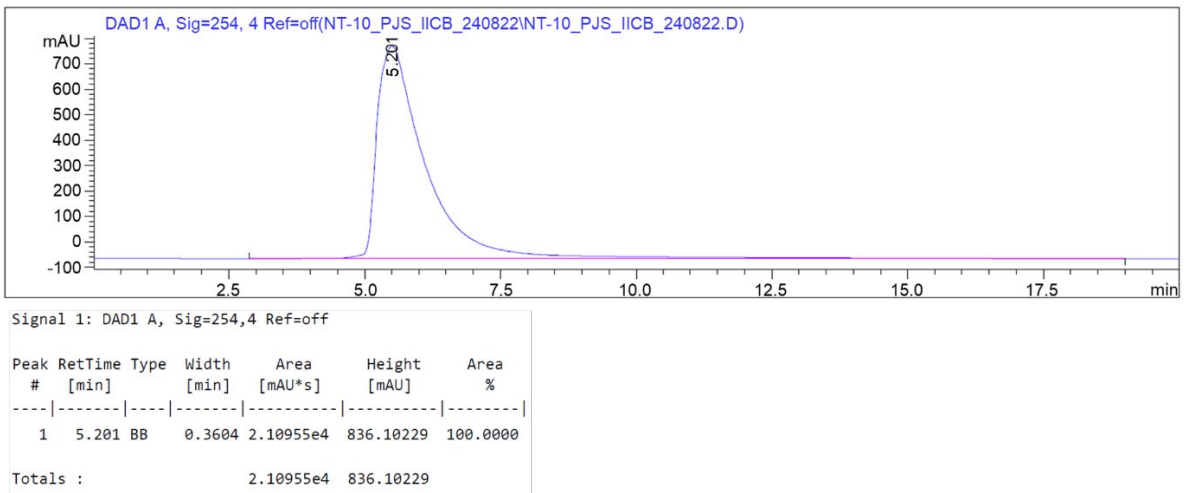

**Figure S16.** HPLC chromatogram of NT-10 peptide.

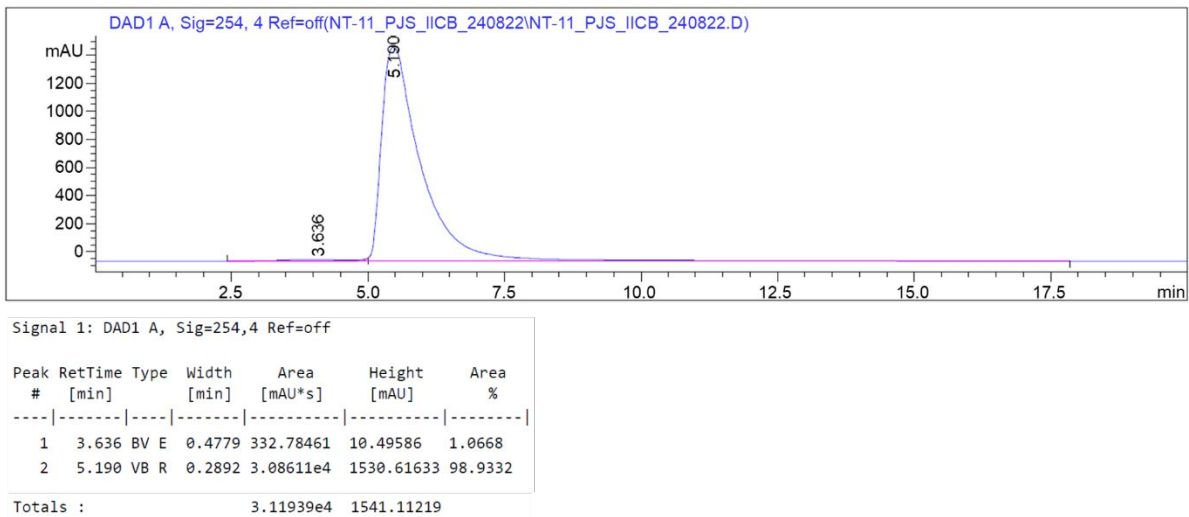

**Figure S17.** HPLC chromatogram of NT-11 peptide.

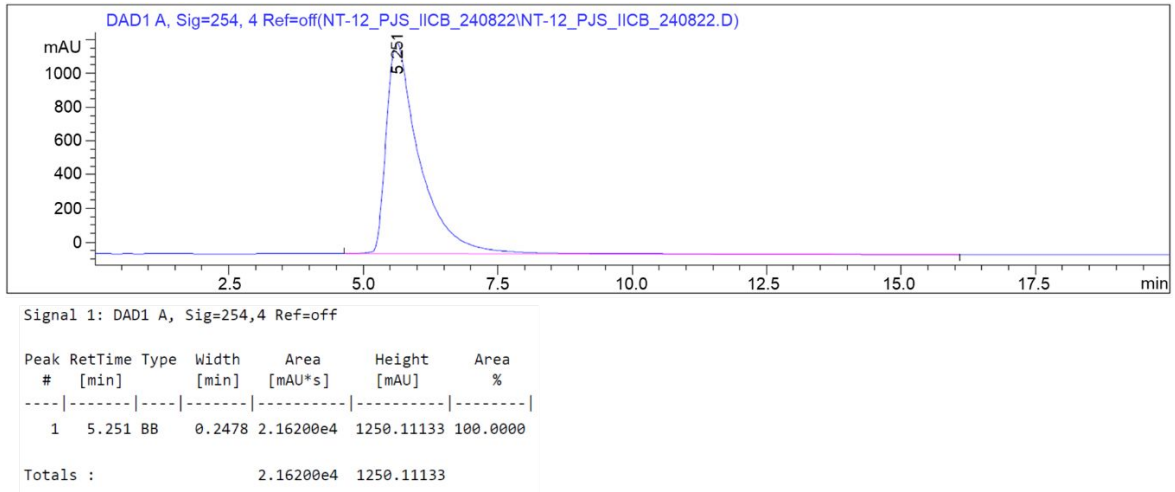

**Figure S18.** HPLC chromatogram of NT-12 peptide.

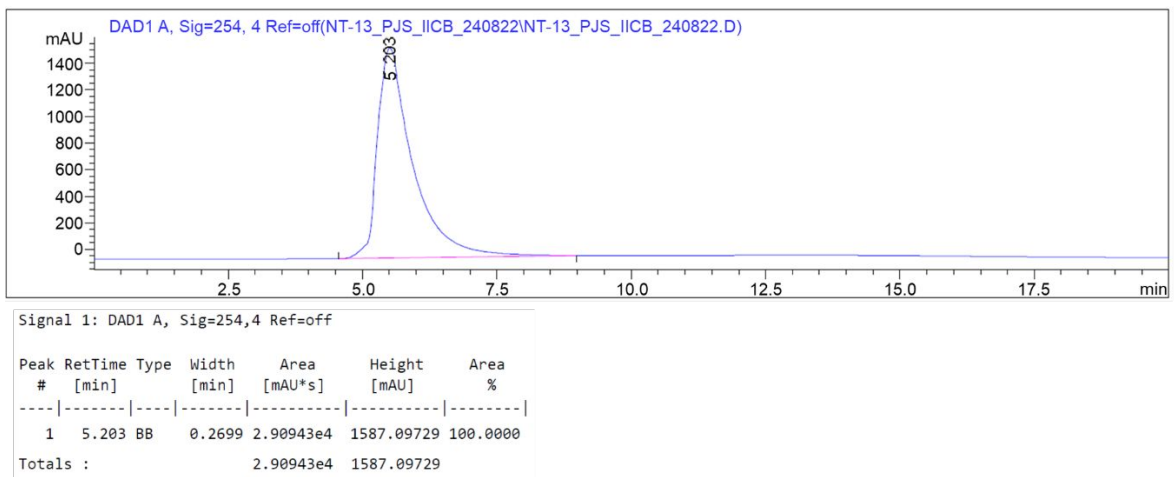

**Figure S19.** HPLC chromatogram of NT-13 peptide.

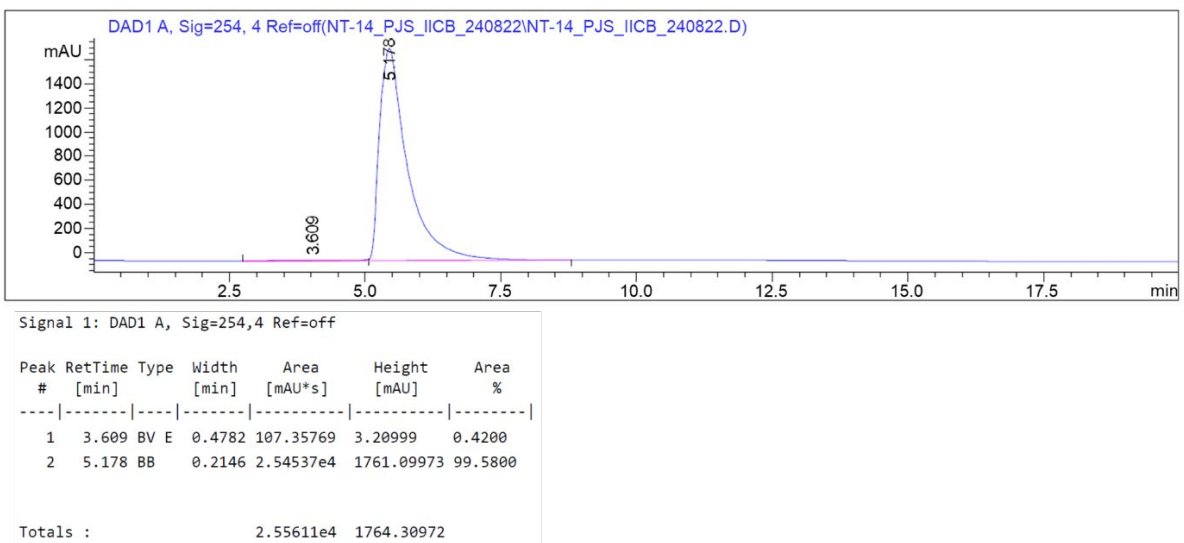

**Figure S20.** HPLC chromatogram of NT-14 peptide.

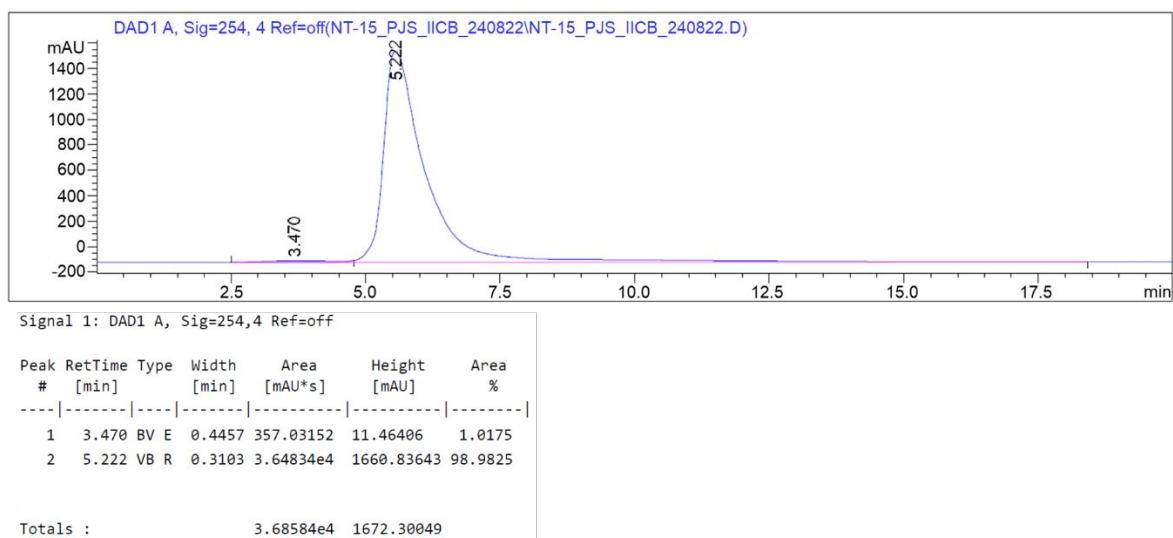

**Figure S21.** HPLC chromatogram of KLVFF peptide.

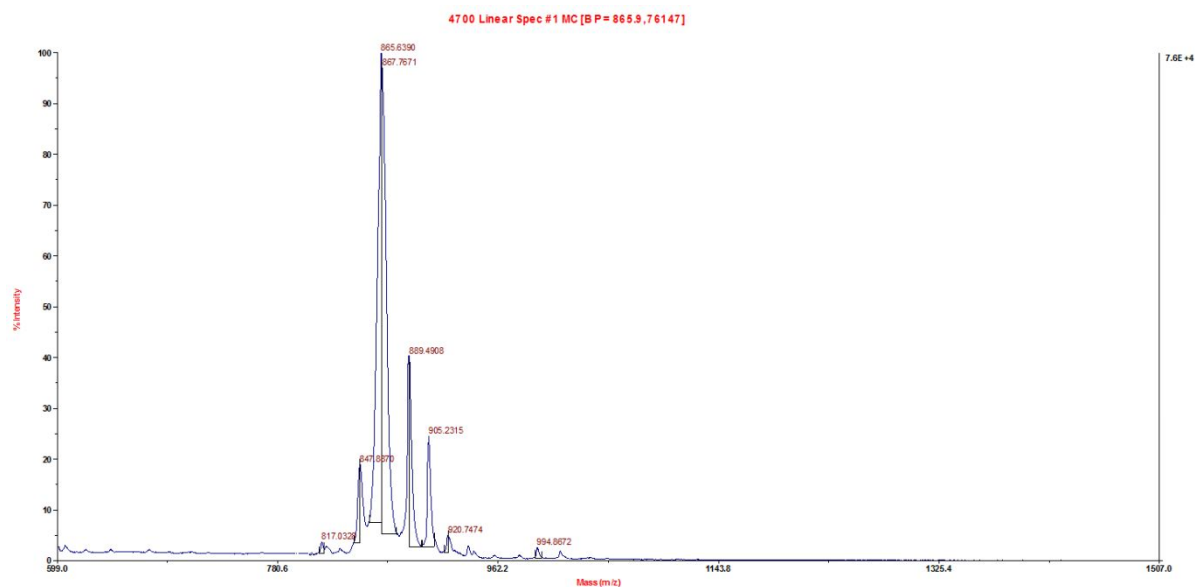

**Figure S22.** MALDI-mass spectrum of NT-01 (KLLFFAE) expected  $m/z = 865.5062$  and observed  $m/z = 865.6390$ .

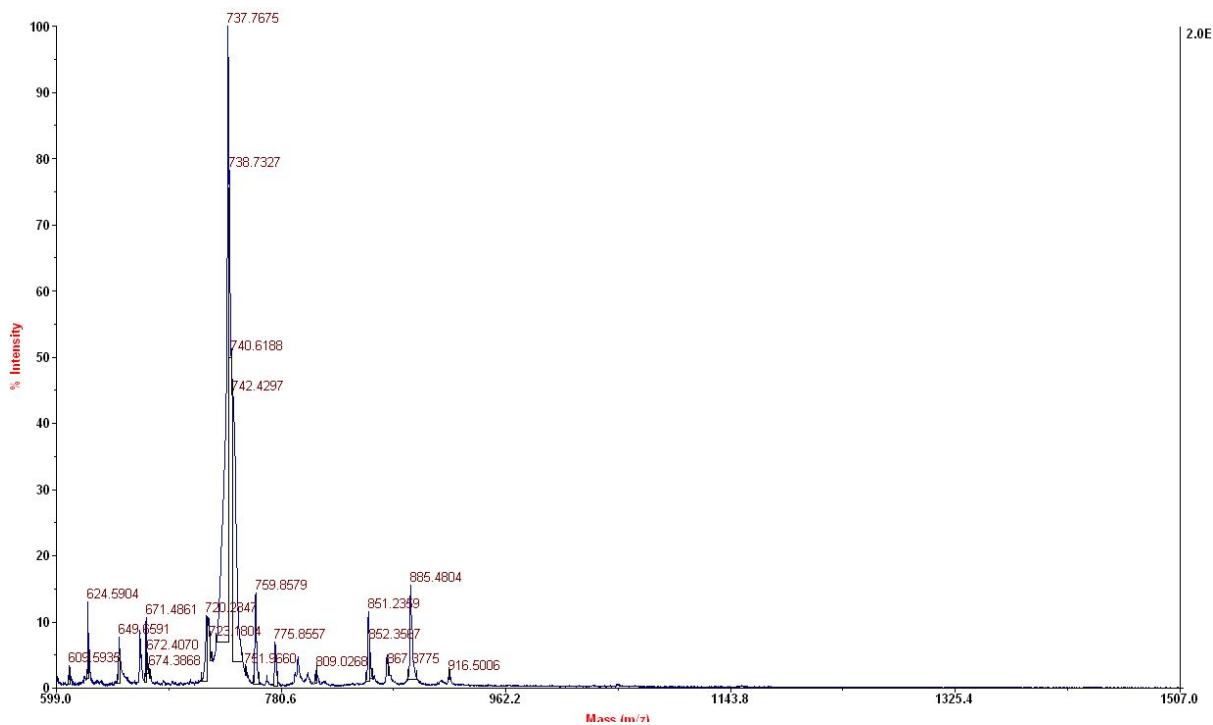

**Figure S23.** MALDI-mass spectrum of NT-02 (KLLFFA) expected  $m/z = 736.4636$  and observed  $m+H = 737.7675$ .

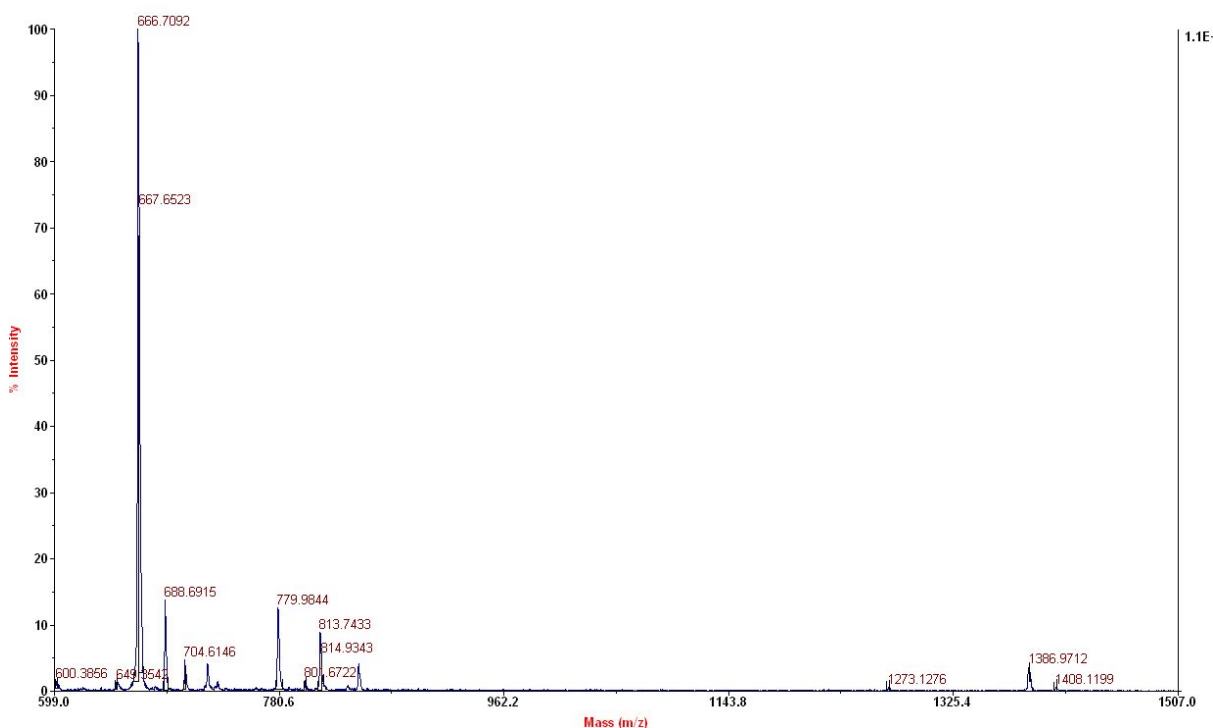

**Figure S24.** MALDI-mass spectrum of NT-03 (KLLFF) expected  $m/z = 665.4265$  and observed  $m+H = 666.7092$ .

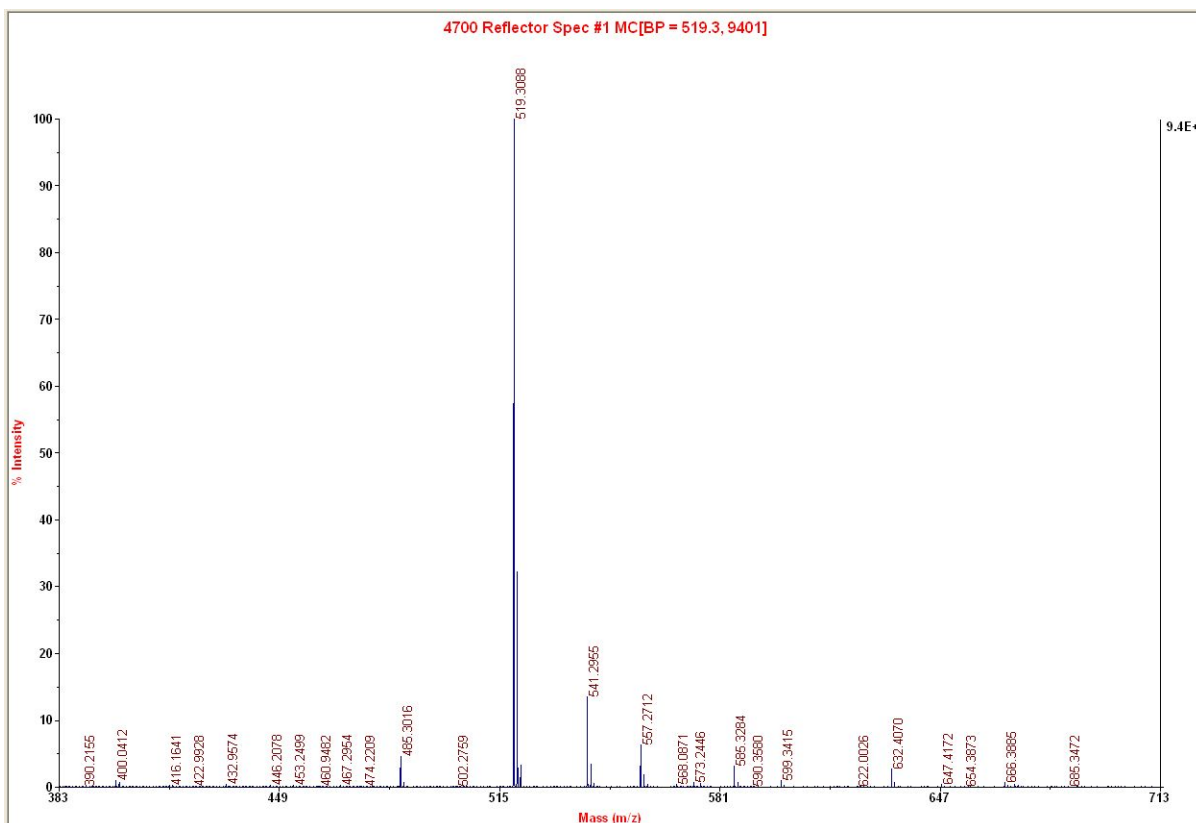

**Figure S25.** MALDI-mass spectrum of NT-04 (KLLF) expected  $m/z = 581.3581$  and observed  $m+H = 519.3088$ .

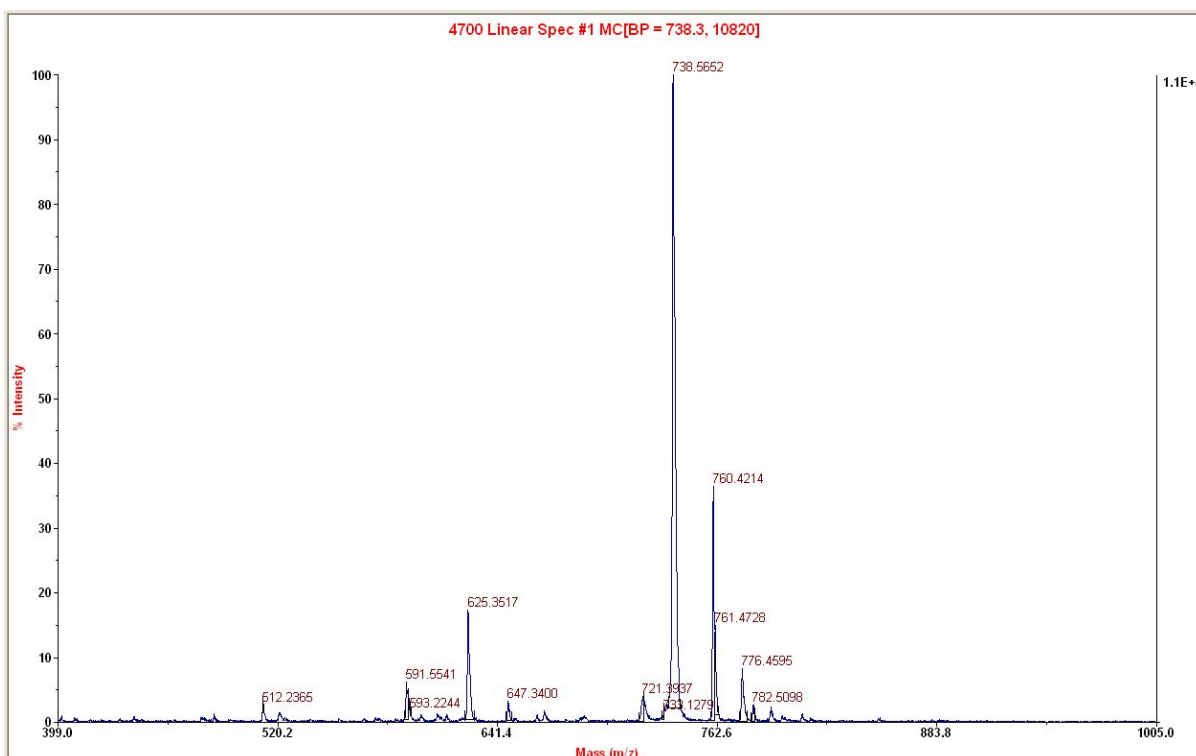

**Figure S26.** MALDI-mass spectrum of NT-05 (LLFFAE) expected  $m/z = 737.4112$  and observed  $m+H = 738.5652$ .



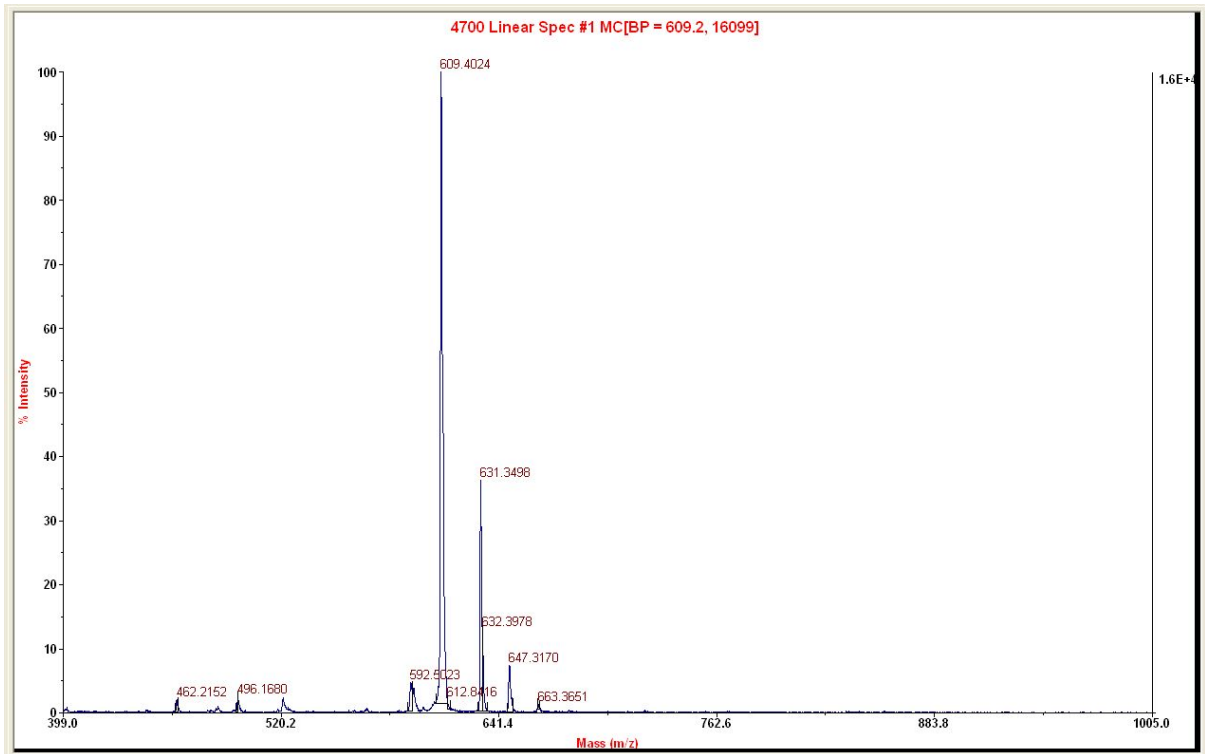

**Figure S27.** MALDI-mass spectrum of NT-06 (LLFFA) expected  $m/z = 608.3686$  and observed  $m+H = 609.4024$ .

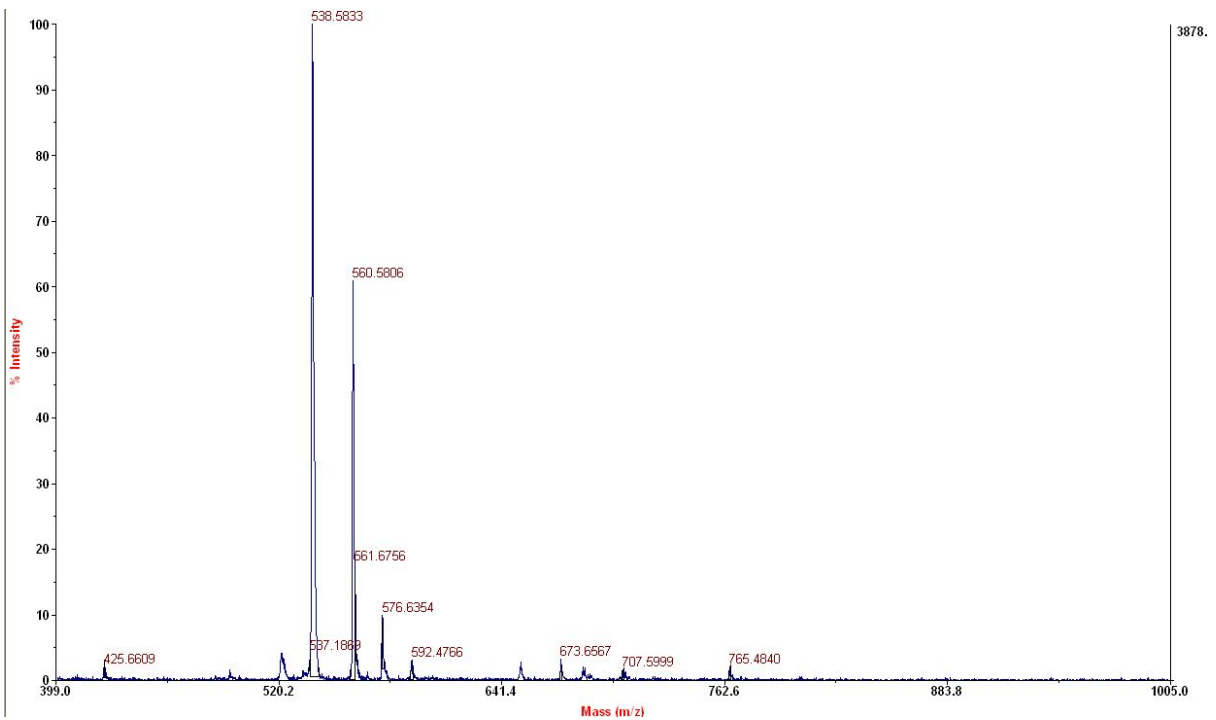

**Figure S28.** MALDI-mass spectrum of NT-07 (LLFF) expected  $m/z = 537.3315$  and observed  $m+H = 538.5833$ .

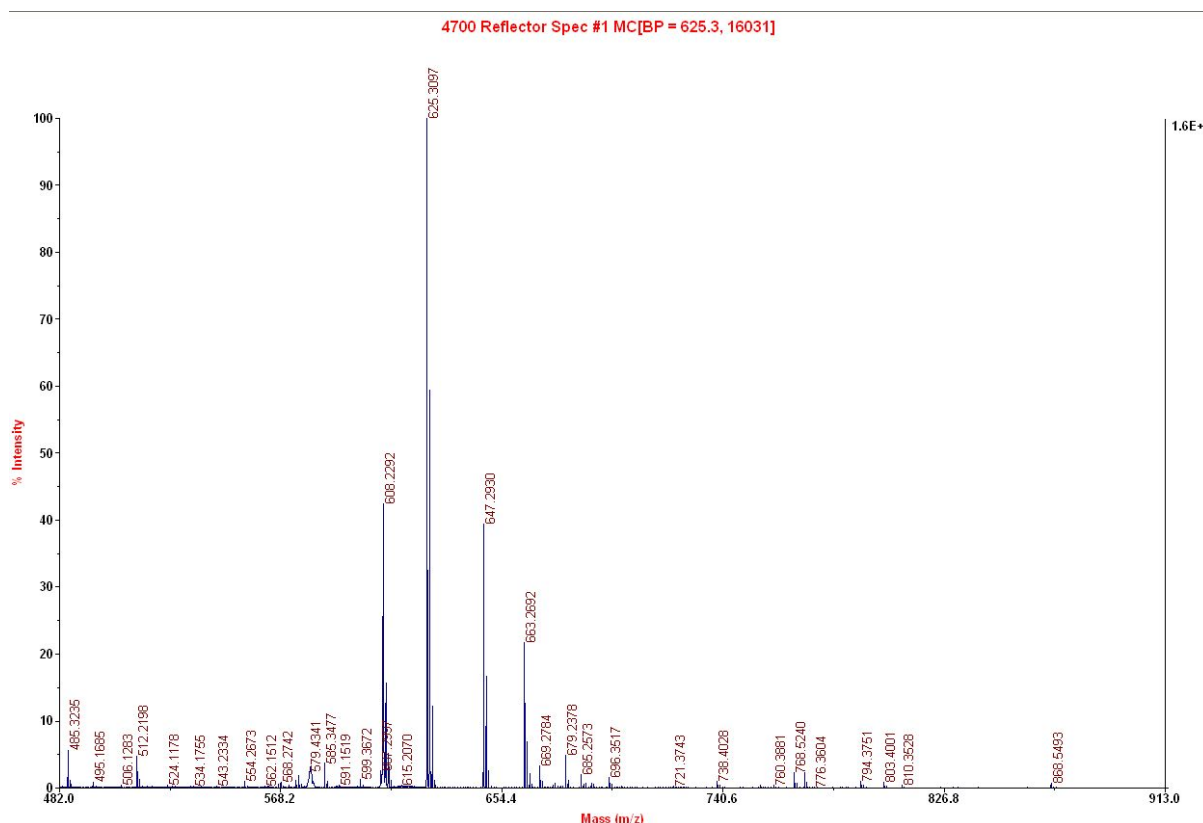

**Figure S29.** MALDI-mass spectrum of NT-08 (LFFAE) expected  $m/z = 624.3271$  and observed  $m+H = 625.3097$ .

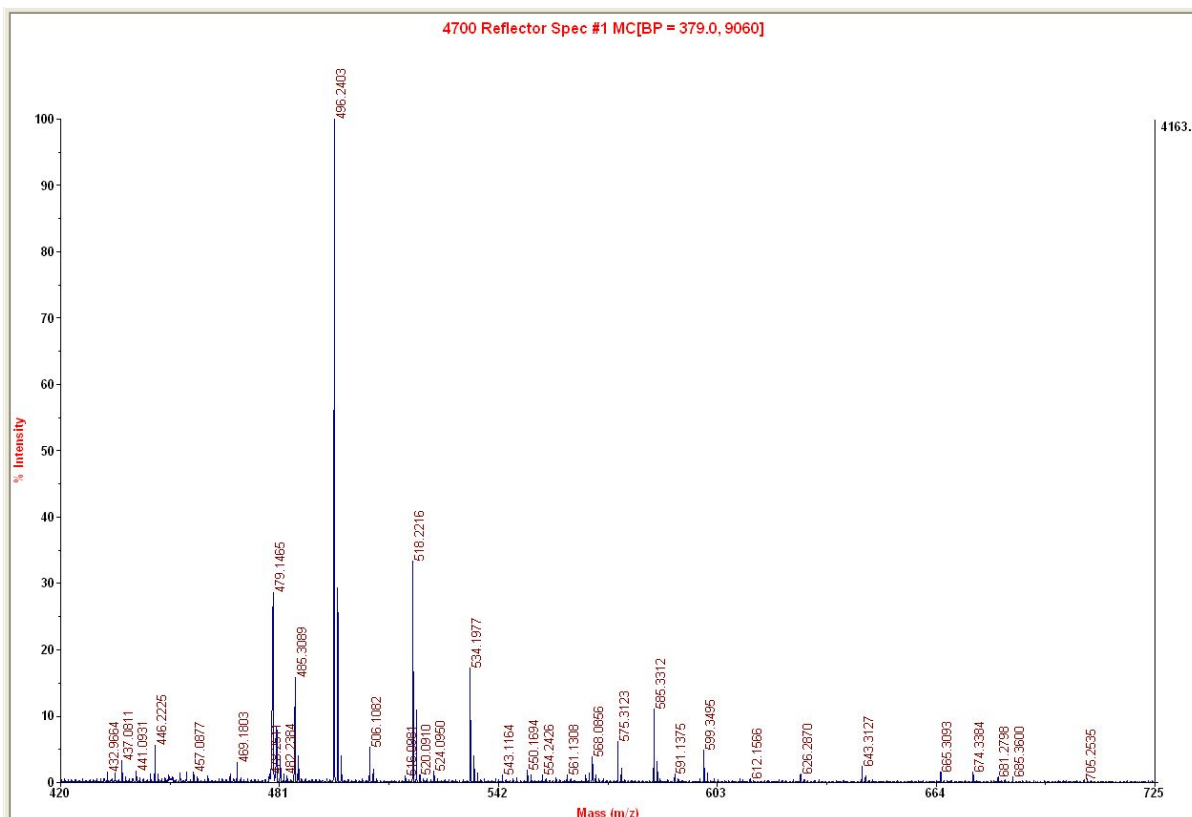

**Figure S30.** MALDI-mass spectrum of NT-09 (LFFA) expected  $m/z = 495.2846$  and observed  $m+H = 496.2403$ .

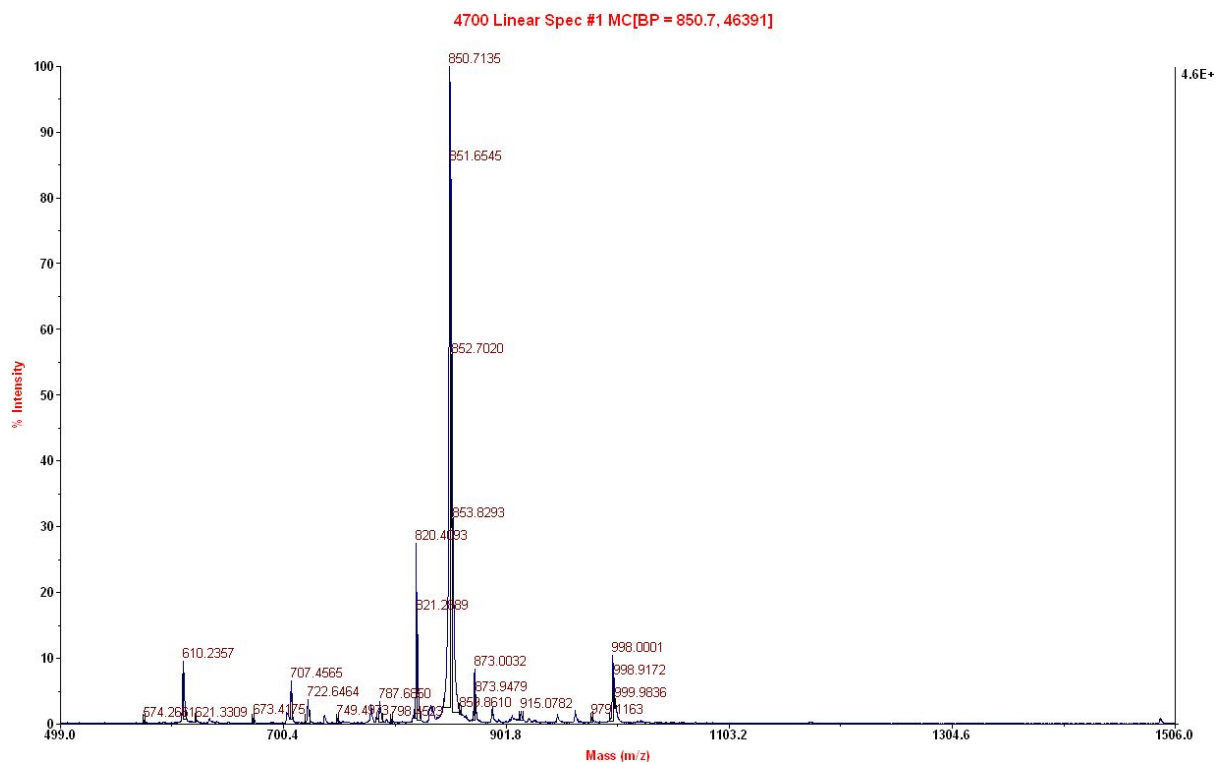

**Figure S31.** MALDI-mass spectrum of NT-10 (KLPFFAE) expected  $m/z = 849.4749$  and observed  $m+H = 850.7135$ .

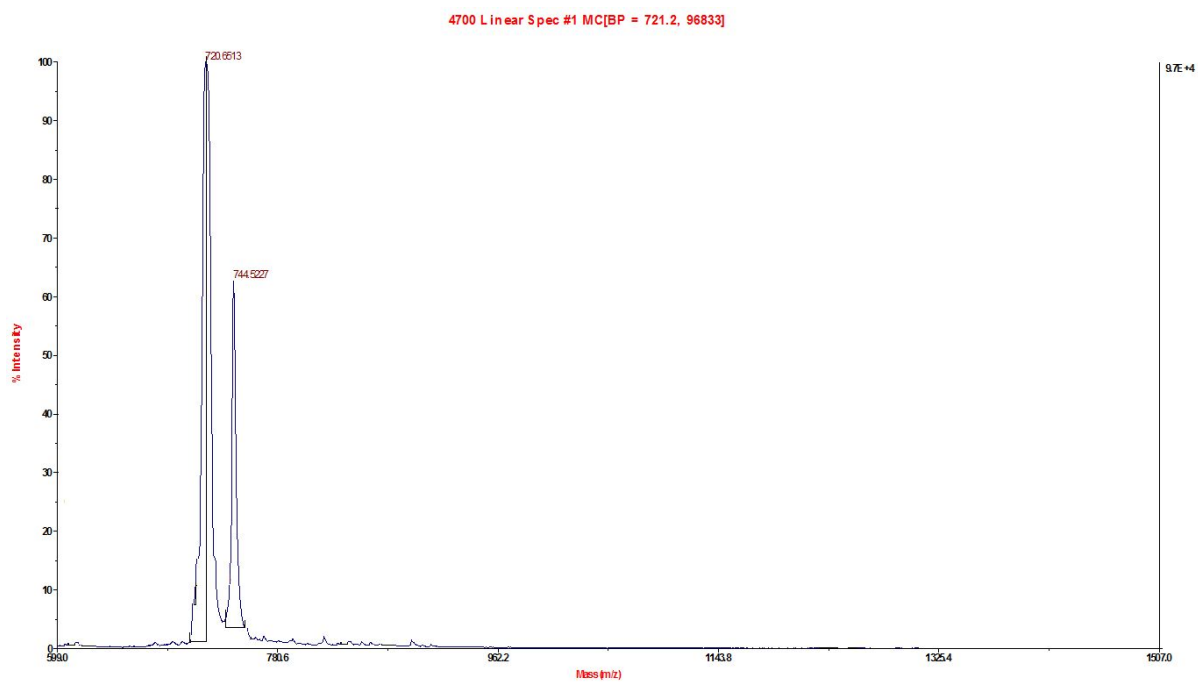

**Figure S32.** MALDI-mass spectrum of NT-11 KLPFFA expected  $m/z = 720.4323$  and observed  $m/z = 720.6613$ .

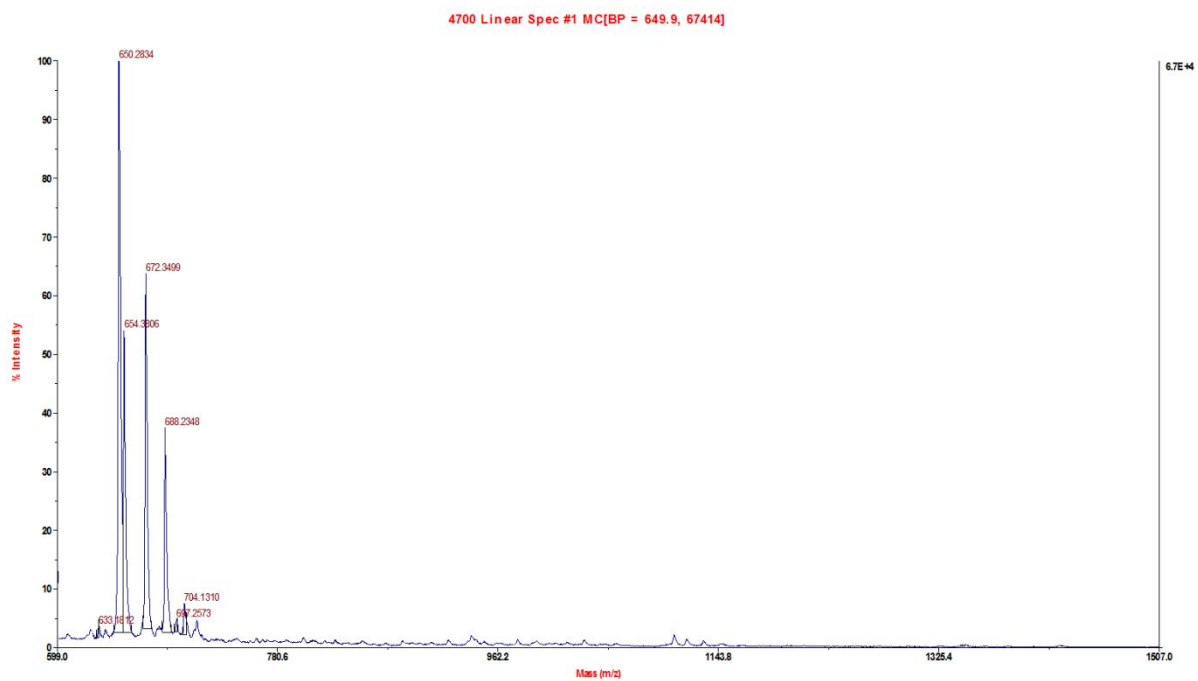

**Figure S33.** MALDI-mass spectrum of NT-12 KLPFF expected  $m/z = 649.3952$  and observed  $m+H = 650.2834$ .

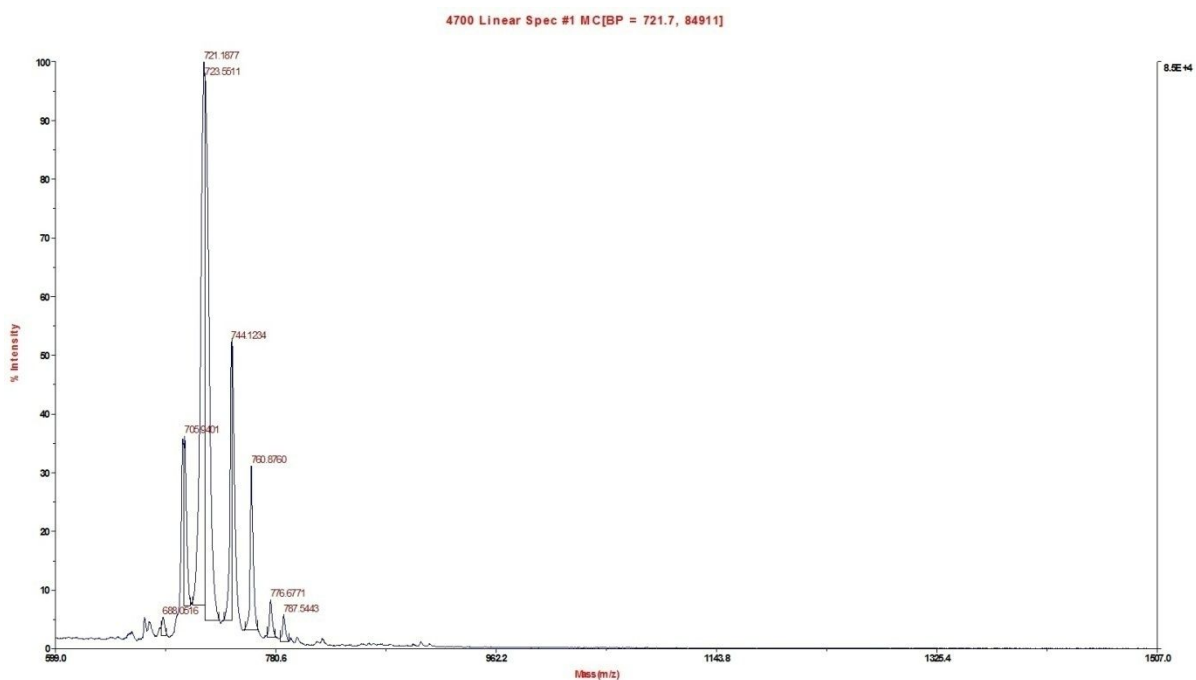

**Figure S34.** MALDI-mass spectrum of NT-13 LPFFAE expected  $m/z = 721.3799$  and observed  $m/z = 721.1677$

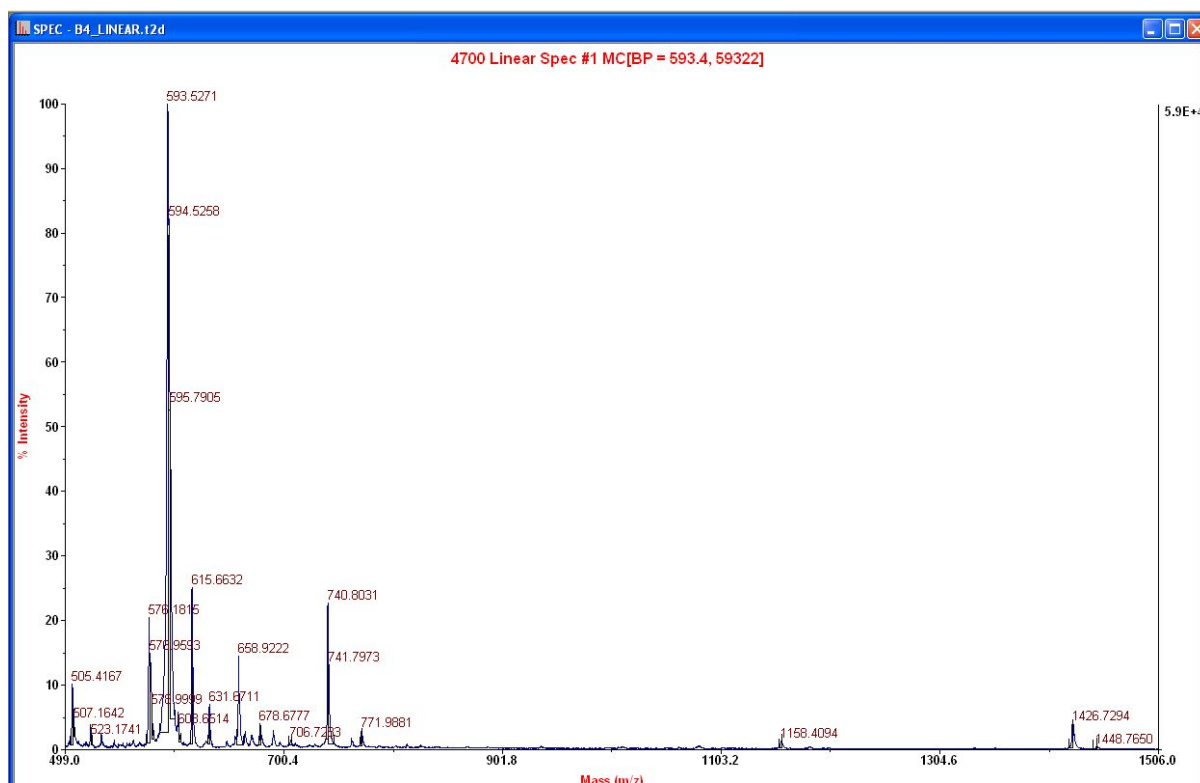

**Figure S35.** MALDI-mass spectrum of NT-14 KLLFFA expected  $m/z = 592.3373$  and observed  $m+H = 593.5271$ .

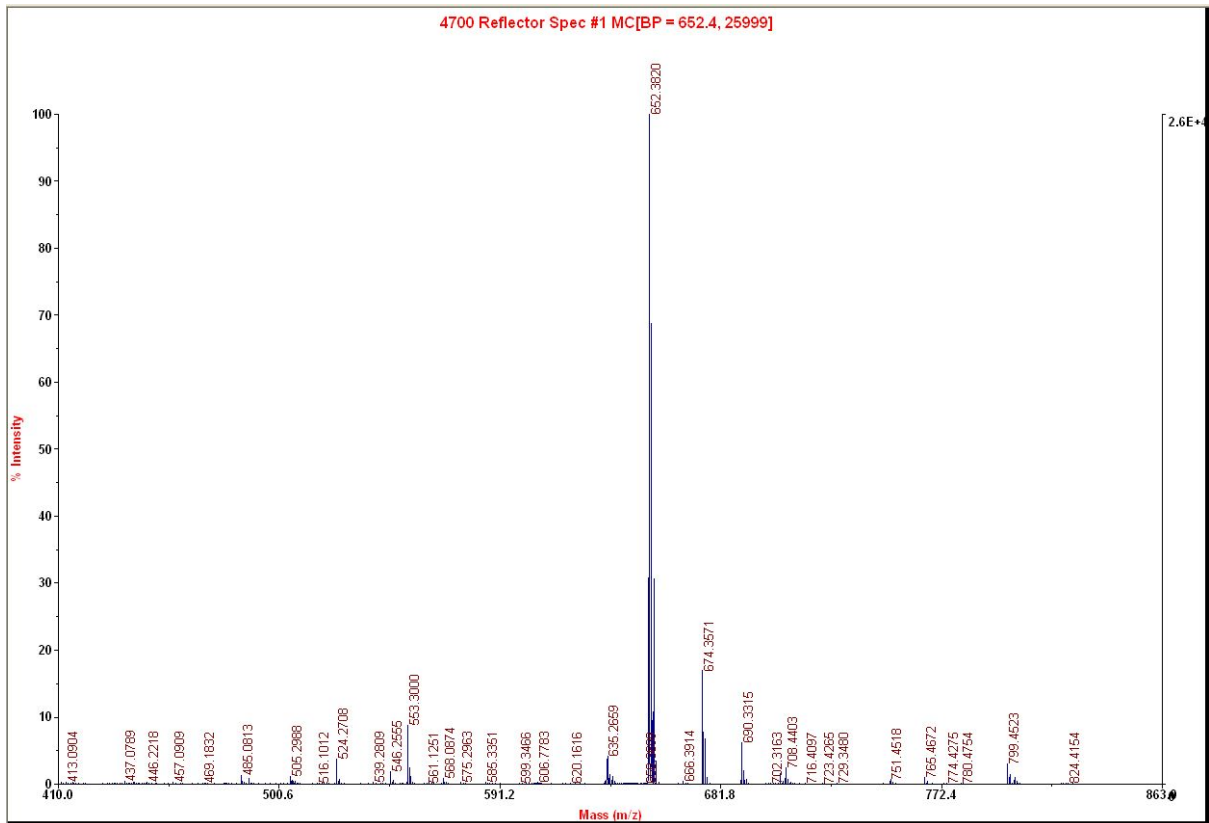

**Figure S36.** MALDI-mass spectrum of KLVFF expected  $m/z = 651.4108$  and observed  $m+H = 652.3820$ .

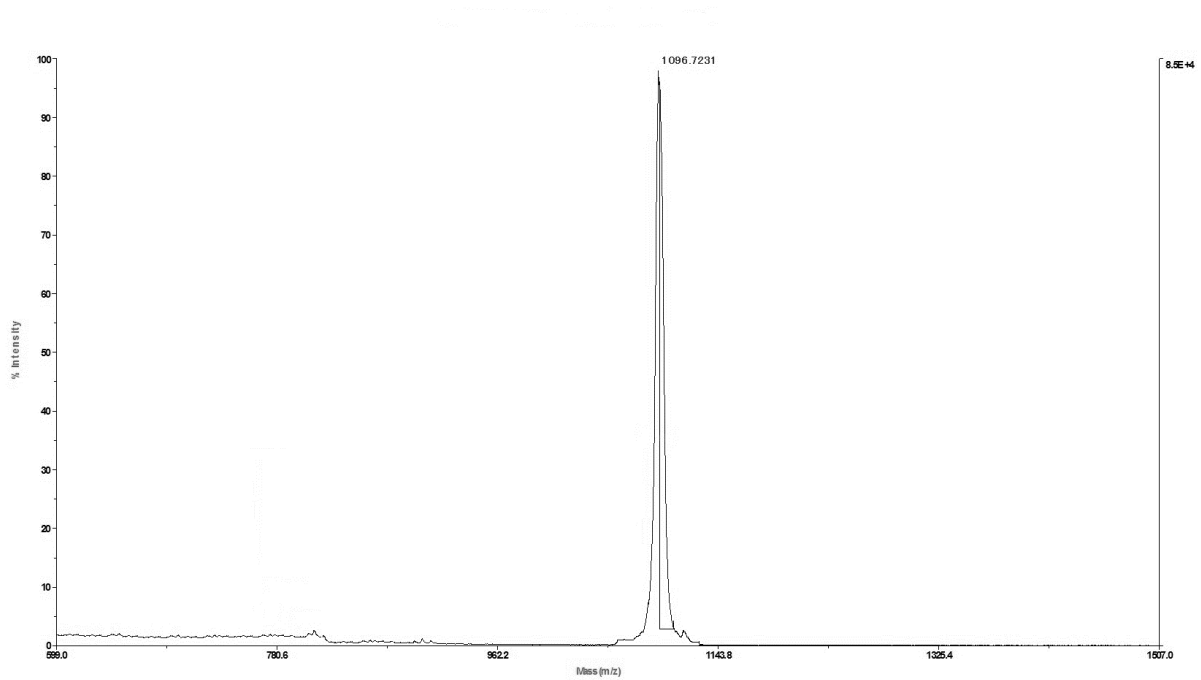

**Figure S37.** MALDI-mass spectrum of FITC attached NT-02 peptide expected  $m/z = 1095.4953$  and observed  $m+H = 1096.7231$ .

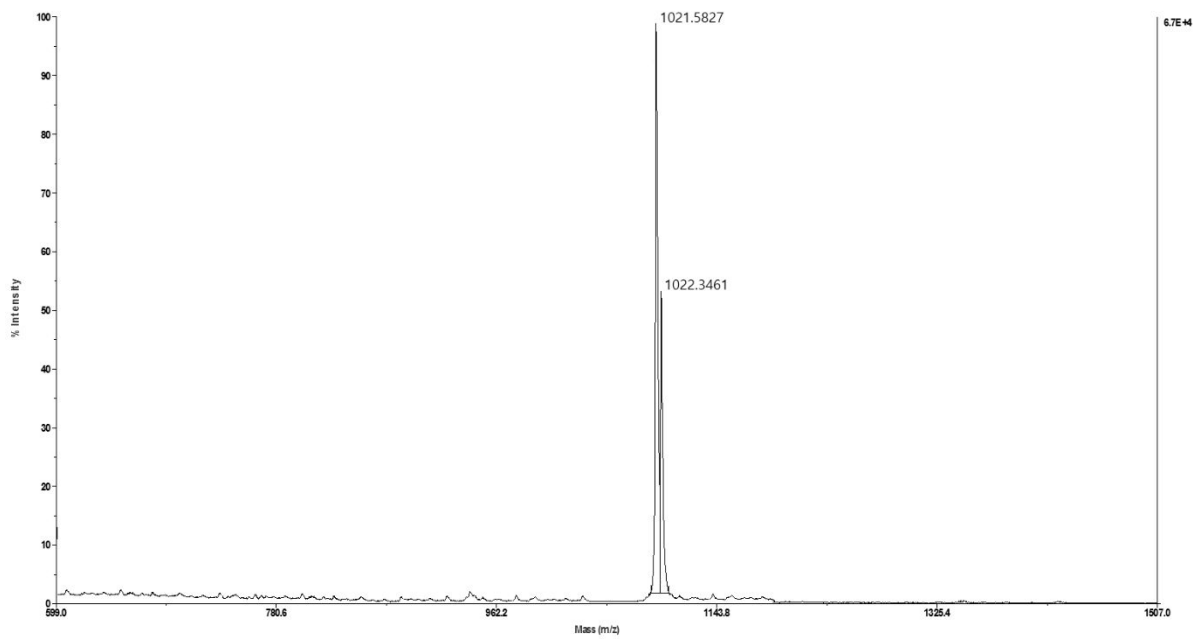

**Figure S38.** MALDI-mass spectrum of FITC attached NT-03 expected  $m/z = 1023.4742$  and observed  $m/z = 1022.3461$ .

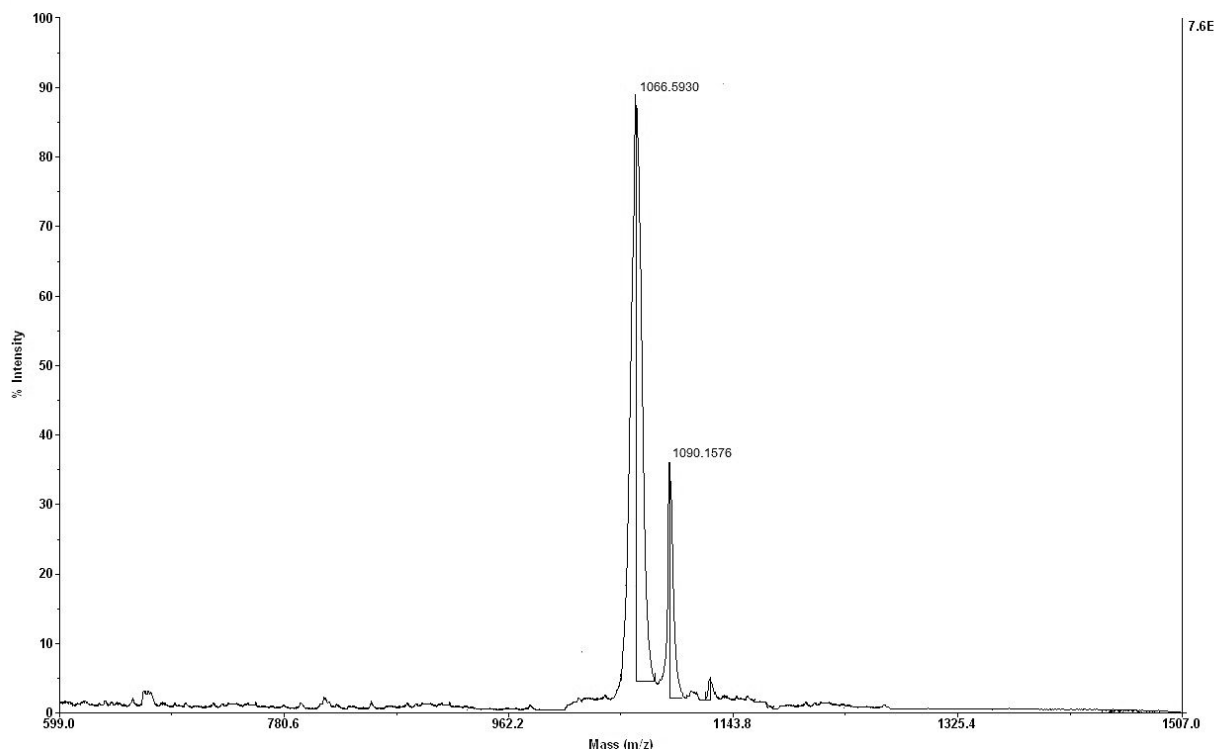

**Figure S39.** MALDI-mass spectrum of FITC attached NT-13 expected  $m/z = 1065.4120$  and observed  $m+H = 1066.5930$  and  $m+Na = 1090.1576$ .

## Spectrum Plot Report

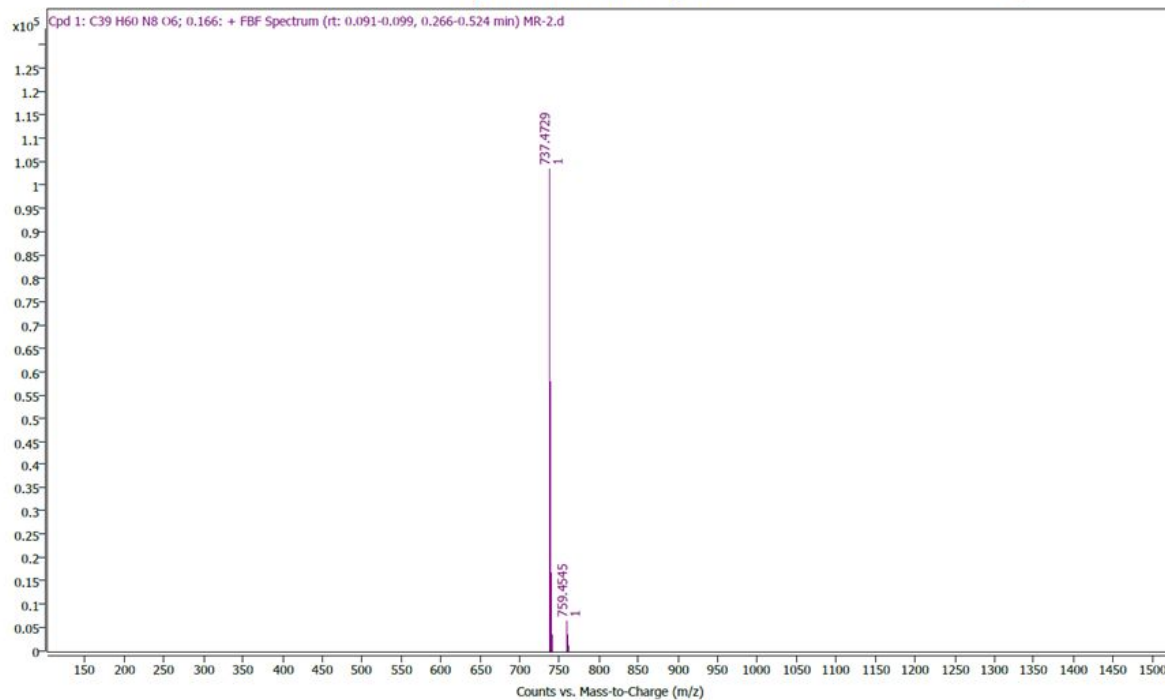

**Figure S40.** HRMS mass spectrum of NT-02 (KLLFFA) expected  $m/z = 736.4636$  and observed  $m+H = 737.4729$  and  $m+Na = 759.4545$ .

## Spectrum Plot Report

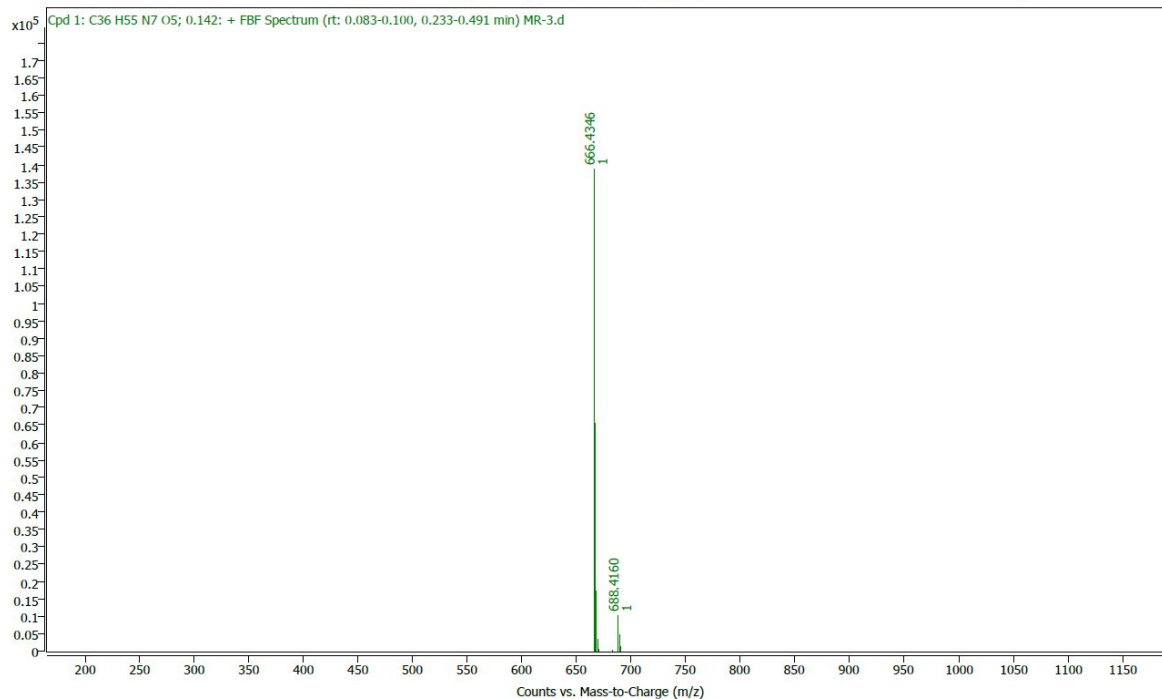

**Figure S41.** HRMS mass spectrum of NT-03 (KLLFF) expected  $m/z = 665.2465$  and observed  $m+H = 666.4346$  and  $m+Na = 688.4160$ .



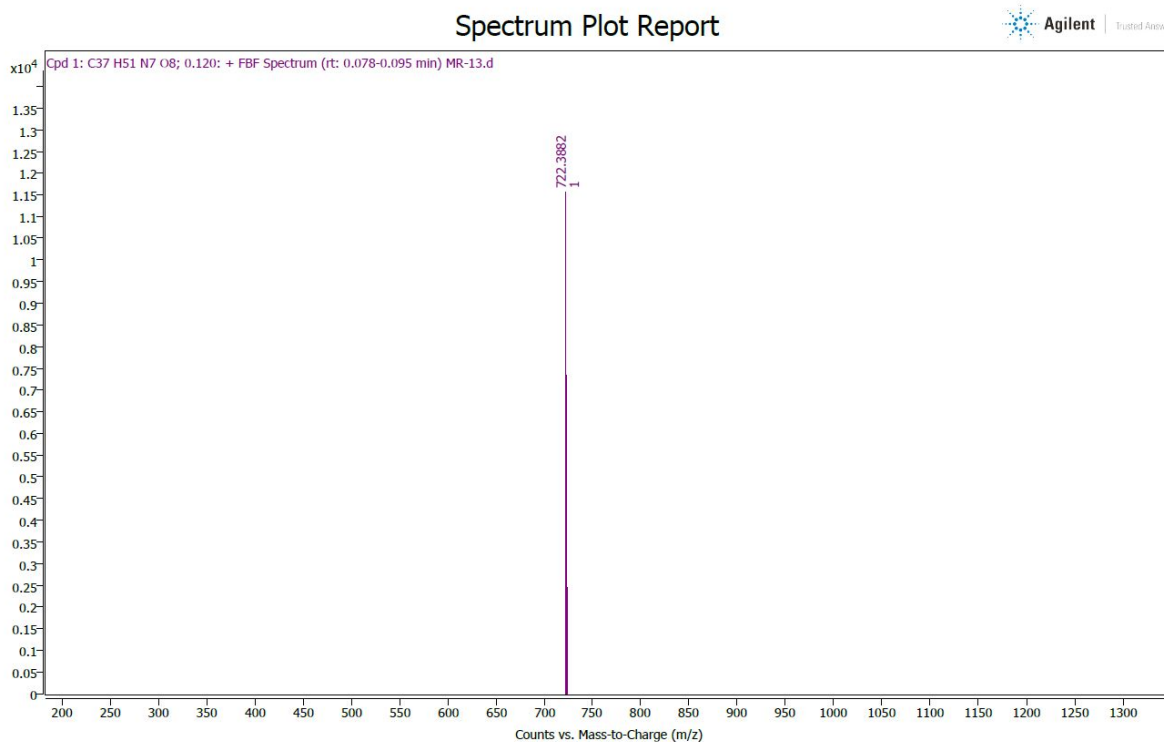

**Figure S42.** The HRMS mass spectrum of NT-13 (LPFFAE) expected  $m/z = 721.3799$  and observed  $m+H = 722.3882$ .

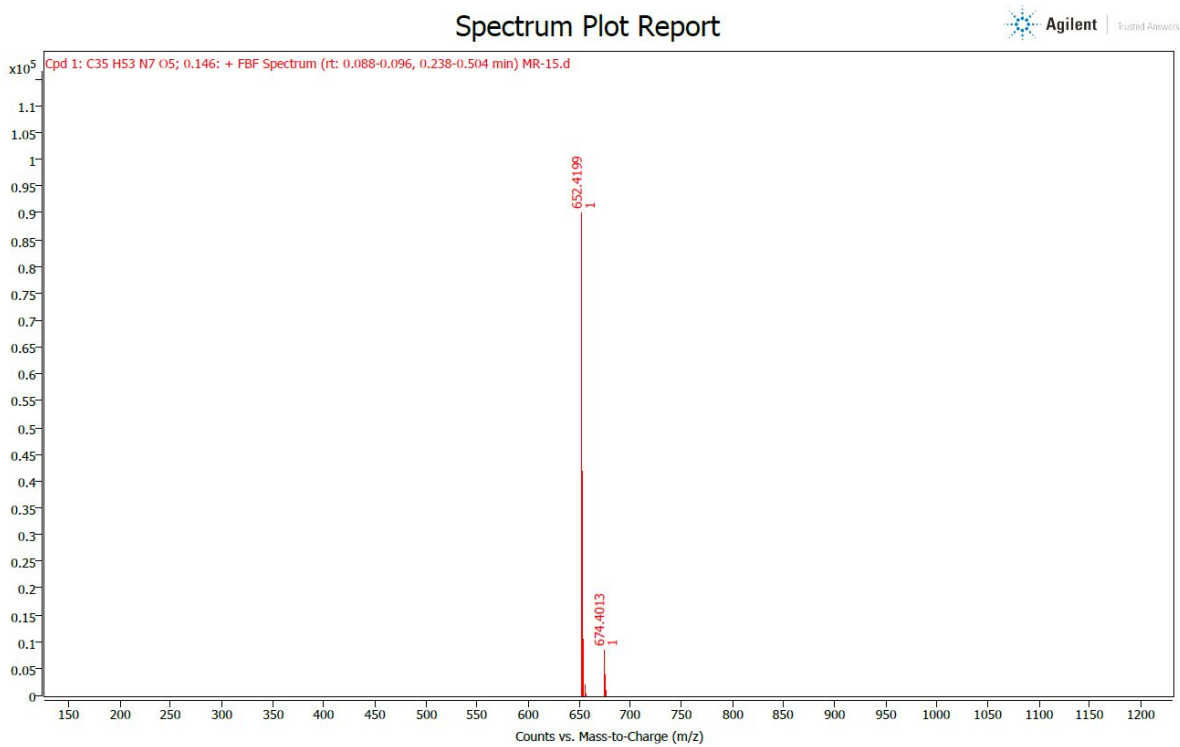

**Figure S43.** HRMS mass spectrum of KLVFF expected  $m/z = 651.4108$  and observed  $m+H = 652.4199$ .
